# Supplementary material for: Identification and quantification of flavonoids in 207 cultivated lotus ( Nelumbo nucifera ) and their contribution to different colors
Source: PeerJ journal article supplement (doi:10.7717/peerj-achem.22), 2022-08-15
Supplement: achem-71194-Raw_data_of_content_and_CI.xls [file achem-71194-Raw_data_of_content_and_CI.xls]

## Sheet: Total
	peak 1	peak 2	peak 3	peak 4	peak 5	peak 6	peak 7	peak 8	peak 9	peak 10	peak 11	peak 12	peak 13	peak 14	peak 15	peak 16	peak 17	peak 18	peak 19	peak 20	peak 21	peak 22	peak 23
1	64.35	24.09	65.49	37.34	250.86	56.42	13.43	24.65	8.6	9.14	134.56	568.98	26.48	0	18.25	246.39	84.51	9.11	936.89	12.86	145.14	23.45	0
2	91.66	34.21	40.15	22.61	161.21	125.07	27.1	36.2	8.03	7.5	113.19	590.23	26.44	0	15.36	94.69	30.06	0	522.68	12.84	70.66	9.57	0
3	99.16	45.48	77.93	76.74	409.42	59.84	19.39	16.45	7.32	9.56	77.24	420.25	29.68	7.06	13.25	41.9	52.08	9.09	395.06	10.77	105.52	12.52	7.92
4	138.1	50.73	100.24	62.32	395	67.08	22.07	32.3	9.31	9.38	86.66	620.12	29.4	0	14.29	52.26	58.2	7.48	510.13	10.33	92.9	10.7	6.85
5	113.43	41.38	113	92.46	514.45	84.08	15.92	24.26	7.59	10.59	173.1	862.37	35.63	0	19.13	229.22	77.41	8.53	963.44	14.33	152.88	14.22	7.23
6	76.43	35.3	69.95	63.81	397.77	86.94	13.69	19.03	8.29	7.83	82.62	577.28	31.48	0	17.69	113.95	82.98	8.26	840.68	11.14	128.7	11.44	8.23
7	85.76	72.58	75.86	104.17	316.92	96.54	15.51	25.21	9.93	6.53	38.93	775.58	44.3	10.07	11.93	45.99	70.91	9.65	1389.35	12.46	246.79	25.6	25.58
8	103.89	46.81	105.32	79.97	392.48	80.62	27.82	34.07	8.05	8.72	101.12	809.39	45.32	8.08	14.12	66.71	42.9	7.51	640.17	15.77	173.13	17.7	9.78
9	121.3	60.05	101.06	91.77	474.68	103.87	26.59	20.33	7.19	11.46	138.97	761.39	39.56	0	14.35	49.77	51.62	8.73	463.89	11.83	124.6	13.03	8.18
10	75.75	34.96	72.93	48.54	330.01	81.77	20.57	36.82	8.46	10.33	104.79	728.22	34.56	0	13.67	40.77	44.57	7.42	373.12	12.58	90.6	10.18	7.28
11	63.84	37.53	52.74	50.32	215.89	39.81	15.26	16.65	8.3	10.03	69.99	306.06	20.68	0	15.89	108.65	66.02	11.34	481.64	9.65	103.66	15.4	8.02
12	83.6	32.2	39.69	18.1	86.42	62.64	19.15	42.27	11.1	7.86	97.87	494.28	16.81	0	13.13	133.28	38.18	0	580.34	7.21	30.15	10.03	0
13	129.76	54.89	126.69	73.91	450.53	66.58	15.41	38.07	9.57	11.81	109.68	428.57	33.97	0	16.59	84.35	83.69	9.71	471.33	12.31	129.89	13.83	12.12
14	57.48	36.43	63.22	80.58	325.32	77.43	19.42	31.03	7.95	9.08	53.3	637.89	40.13	11.84	10.86	19.31	70.49	0	984.98	12.46	172.71	22.97	14.58
15	158.47	52.89	135.8	57.02	380.85	94.77	16.26	36.98	7.75	8.82	110.82	515.27	36.24	0	14.3	48.94	53.9	8.07	337.25	12.26	110.11	9.18	0
16	52.84	22.97	63.78	44.88	295.39	51.43	8.99	40.07	7.95	10.45	62.14	598.7	32.24	0	10.41	22.83	88.6	0	942.01	12.44	157.43	16.76	0
17	63.47	22.23	29.12	16.86	115.1	84.24	12.26	29.76	7.69	0	97.33	476.41	20.35	0	13.25	77.59	28.04	0	438.09	9.73	58.03	9.15	0
18	104.29	25.04	91.53	38.34	295.53	53.8	12.26	25.21	9.02	8.17	78.93	442.33	28.5	7.66	13.89	154.81	63.04	7.73	783.42	11.52	120.55	16.45	7.85
19	87.97	39.96	39.06	19.29	132.76	56.23	16.12	19.64	8.06	10.78	94.78	377.27	15.12	0	17.41	60.8	76.48	8.07	382.09	9.17	36.07	10.06	0
20	70.84	24.1	52	31.08	178.17	75.76	22.63	31.02	10.72	14.64	174.23	357.31	30.9	8.18	23.9	197.48	131.63	13.6	584.74	13.04	112.38	22.54	9.56
21	54.38	32.41	68.09	56.71	270.5	48.17	17.53	24.46	6.86	23.65	165.17	472.38	29.43	0	14.29	20.33	29.49	33.67	286.24	11.78	162.77	23.76	11.72
22	243.37	159.58	94.95	50.68	172.96	143.81	30.68	52.67	14	13.32	263	1313.99	41.63	9.22	25.81	520.27	84.1	11.01	2065.96	11.78	81.36	20.45	7.34
23	173.03	57.92	77.3	29.03	205.14	109.52	15.97	18.12	10.56	7.4	71.24	349.2	27.68	0	24.13	82.9	81.43	8.31	505.42	12.96	64.44	13.37	0
24	131.98	62.06	104.1	62.91	422.45	38.78	11.9	26.54	7.72	10.75	33.37	215.35	23.17	0	9.77	27.64	41.51	7.71	182.79	8.54	68.33	10.77	7.49
25	91.8	41.94	44.19	22.26	99.11	64.88	21.37	42.9	11.14	8.52	115.22	562.9	18.15	0	14.65	143.72	48.11	0	732.36	9.38	36.26	11.25	8.11
26	386.38	111.26	148.34	46.44	269.42	149.99	32.26	44.6	8.17	11.19	205.17	855.63	34.16	0	17.98	77.61	46.41	7.05	434.34	10.66	50.55	9.64	0
27	423.32	138.31	173.18	58.08	340.72	157.93	31.7	35.58	7.79	11.72	205.39	818.45	37.65	0	19.65	70.76	51.32	7.52	416.83	11.27	57.75	9.36	0
28	65.39	35.58	76.42	59.71	346.54	30.25	11.34	14.48	7.96	8.62	58.52	277.11	22.54	0	16.43	124.03	87.31	8.72	585.62	8.64	114.86	11.91	0
29	186.61	96.98	126.76	89.22	419.91	69.37	16.67	21.34	9.17	9.77	74.45	386.65	31.48	10.63	15.2	60.25	55.16	7.34	382.34	10.35	78.6	13.22	18.9
30	64.92	31.72	41.91	31.36	138.37	58.42	15.21	39.89	7.47	8.25	125.26	597.01	18.68	0	13.08	173.91	42.54	0	914.21	9.83	59.42	12.79	7.98
31	40.46	32.27	33.36	43.31	120.03	83.81	14.56	20.75	10.45	0	33.05	838.68	34.13	9.88	9.63	55.2	52.67	9.87	1210.33	14.33	200.89	28.5	26.44
32	59.03	31.91	47.45	50.58	250.94	52.11	12.2	22.5	7.33	9.02	17.71	336.37	18.56	7.47	0	9.18	24.92	0	181.25	6.3	54.2	13.59	10.42
33	38.37	44.47	30.44	43.63	99.83	107.41	25.51	38.17	9.08	27.58	330.19	1699.59	63.9	0	24.26	32.81	70.08	21.92	300.7	16.09	302	28.63	14.03
34	111.59	50.39	85.97	54.15	296.41	91.11	22.72	37.03	8.74	10.18	86.04	528.3	31.42	0	12.85	27.09	48.27	7.72	277.88	11.18	85.3	10.53	6.87
35	98.14	41.4	86.23	53.02	353.61	89.65	23.05	41.62	8.6	10.99	115.3	805	47.8	0	15.05	40.27	44.81	7.4	355.82	12.65	90.47	10.38	7.12
36	104.52	47.19	111.6	87.71	470.13	80.16	25.03	41.99	7.69	6.86	35.64	743.88	50.19	8.46	9.44	15.05	40.87	0	520.2	12.41	170.6	16.72	11.5
37	40.4	37.03	46.2	65.89	170.73	60.75	17.46	25.79	7.41	18.32	123.08	802.11	27.58	9.14	17.36	37.77	54.13	23.57	200.57	10.56	182.05	29.54	10.83
38	190.84	58.19	125.08	57.49	395.34	89.44	21.81	35.88	8.3	8.82	86.75	631.13	31.34	0	13.23	33.83	43.06	7.1	307.57	9.27	73.9	10.22	7.22
39	140.74	51.71	65.97	34.01	301.84	96.15	27.7	30.35	7.73	10.16	112.17	442.21	22.35	0	12.87	41.64	40.88	0	223.48	10.84	48.48	9.16	0
40	45.65	23.28	41.7	46.03	280.46	57.34	16.48	17.41	7.45	0	48.86	325.14	22.92	0	10.94	64.99	43.26	7.26	402.56	9.89	101.74	10.55	8.28
41	87.59	63.05	79.37	96.63	349.62	105.25	17.38	22.78	8.62	7.48	45.32	885.2	53.87	12.16	9.16	36.17	97.76	7.86	1558.07	15.81	251.62	23.78	28.11
42	34.11	13.52	27.33	23.36	112.81	67.26	14.36	17.85	8.02	8.61	88.33	425	21.79	8.82	16.86	205.87	34.91	8.47	870.64	12.35	87.58	19.14	15.58
43	27.41	18.21	25.54	32.36	115.92	30.85	10.92	11.56	8.45	7.5	37.56	235.15	17.78	7.49	20.25	185.59	64.36	9.62	1152.8	10.21	105.58	24.23	16.57
44	120.62	37.69	50.08	22.53	194.37	116.85	16.14	31.72	9.2	8.5	159.99	654.97	24.01	0	15.85	89.1	45.85	0	484.38	10.71	61.99	9.59	0
45	40.09	34.48	30.96	42.28	129.5	128.76	25.44	55.5	7.32	48.56	348.56	1642.15	55.6	15.47	20.3	26.06	52.72	40.93	444.01	15.68	229.68	30.86	19.22
46	43.81	20.37	40.34	29.61	158.41	28.76	9.5	9.9	7.54	7.75	41.65	224.16	17.02	0	12.82	76.28	58.69	8.58	511.41	8.79	82.86	17.67	9.98
47	40.43	27.11	50.49	67.82	307.08	85.09	10.49	25.63	8.59	0	33.08	891.05	36.4	11.42	7.51	28.45	82.88	0	1637.75	13.32	241.66	35.41	30.74
48	127.83	53.2	104.56	69.28	463.12	95.29	14.09	33.02	7.21	0	46.46	714.63	39.94	0	11.29	14.11	54.87	0	529.06	13.16	143.36	11.78	7.72
49	92.4	39.2	75.4	53.08	341.47	47.06	12.6	30	7.65	10.65	51.39	325.24	23.4	0	11.55	31.21	44.27	7.35	207.6	9.86	62.71	10.1	6.78
50	65.64	18.76	43.58	14.05	61.44	61.44	18.43	34.93	7.52	11.59	169.8	821.71	22.94	0	16.18	116.23	54.84	7.85	565.31	9.24	58.96	12.41	0
51	64.85	26.26	47.18	25.72	147.26	68.87	17.23	15.22	6.92	7.74	78.49	385.22	20.14	0	8.95	46.43	21.68	6.65	201.11	8.63	51.12	10.08	7.16
52	54.06	20.07	36.93	26.57	128.35	76.36	19.97	23.21	7.69	8.96	82.81	434.77	21.87	8.55	9.59	70.27	20.46	7.81	277.84	11.02	59.73	13.26	10.61
53	194.73	89.1	73.93	37.1	227.65	182.13	21.31	42.14	10.06	8.36	88.93	564.98	36.75	0	15.87	52.74	51.37	0	514.73	12.02	76.9	8.83	0
54	62.93	28.84	47.86	33.57	176.18	76.43	23.39	31.69	7.64	9.72	90.77	631.39	29.43	0	13.47	51.78	45.78	7.84	498.74	11	110.88	13.85	10.82
55	19.35	10.07	22.73	19.15	102.33	40.48	11.22	14.38	7.11	7.71	48.54	353.9	19.32	7.98	13.37	57.93	59.62	8.41	539.12	9.24	90.43	16.25	0
56	85	47.71	67.15	48.81	210.21	117.7	18.7	38.7	7.78	0	36.61	693.34	41.59	0	9.58	20.07	49.8	0	855.05	12.25	165.39	16.61	18.5
57	67.6	30.56	55.3	37.55	215.44	60.66	18.22	36.66	6.69	0	29.67	775.15	21.27	0	8.76	10.22	31.19	0	319.8	10.09	67	10.68	0
58	83.87	36.11	70.07	46.38	287.37	72.56	19.04	39.82	13.5	8.53	50.03	352.62	30.25	0	14.23	50.33	70.61	7.52	479.32	10.97	105.31	9.83	0
59	129.47	44.29	102.18	61.06	404.03	98.23	18.91	23.37	7.94	8.63	82.76	518.56	37.82	0	12.25	41.19	36.45	7.26	309.74	10.59	113.14	11.93	8.42
60	23.07	15.31	20.63	23.77	98.59	68.22	18.53	21.91	7.83	8.06	124.68	845.95	29.77	8.86	12.48	153.07	32.63	7.48	902.31	10.8	163.05	17.04	9.08
61	76.04	50.27	32.99	26.7	142.71	79.7	15.31	19.64	8.47	8.12	57.52	383.71	20.09	7.05	13.58	59.73	43.59	7.59	366.51	7.17	49.37	9.05	6.39
62	27.32	15.37	22.34	23.47	123.42	31.78	12.56	14.38	8.59	7.35	33.4	201.2	15.88	0	9.53	57.89	32.3	6.97	348.61	8.66	74.73	9.76	6.4
63	37.81	22.17	32.62	37.52	187.32	40.46	11.3	12.46	7.06	8.32	43.34	201.66	15.79	0	11.42	46.76	46.94	8.25	273.59	8.18	73.07	9.52	0
64	41.17	22.77	47.37	50.91	225.39	50.09	14.64	39.03	9.93	8.22	37.5	625.74	30.12	8.28	9.4	24.41	83	0	808.24	13.63	139.23	17.02	9.75
65	55.24	33.08	63.54	76.42	309.56	63.41	20.87	34.03	7.29	10.79	98.94	652.99	44.7	82.45	13.72	140.22	57.72	8.53	1122.01	0	232.29	18.62	16.24
66	58.95	28.06	50.91	50.5	249.48	39.27	13.71	12.21	7.53	8.01	50.3	286.89	22.77	6.91	13.31	92.56	71.14	9.06	787.21	9.49	116.27	20.78	8.16
67	44.58	22.35	49.16	46.48	243.14	34.02	14.09	16.34	8.36	7.91	36.56	293.68	23.47	6.99	11.69	50.75	62.7	8.29	451.11	9.06	116.5	15.82	6.86
68	157.67	39.77	85.1	37.22	224.71	84.79	21.06	71.31	7.55	11.58	128.04	577.71	23.54	0	12.64	41.44	35.76	6.96	266.82	7.38	40.74	8.36	0
69	81.83	28.4	37.35	15.07	74.72	125.19	13.4	24.43	12.71	7.32	69.78	633.62	34.53	7.88	14.67	275.72	61.74	6.96	1695.71	10.32	71.88	12.03	7.04
70	90.41	32.09	98.31	60.63	380.73	66.52	16.89	18.39	7.71	6.81	60.97	465.1	36.66	7.48	12.95	50.02	60.5	8.3	341.79	11.08	129.19	17.77	11.26
71	147.09	42.99	84.04	40.73	235.79	89.28	21.74	72.85	8.03	11.59	142.58	647.66	25.63	0	14.64	57.79	50.86	7.05	403.83	8.25	50.98	8.9	0
72	153.5	48.49	62.71	20.93	117.21	181.26	18.51	31.82	10.33	0	110.76	1048.46	40.26	190.37	16.34	173.28	50.48	0	1204.11	10.84	73.28	11.88	9.64
73	120.97	42.72	51.51	18.56	93.21	179.95	21.03	33.84	10.73	7.88	147.12	1265.61	39.58	0	15.82	191.16	42.18	0	1232.74	11.55	61.88	9.61	0
74	123.49	57.41	102.96	88.34	502.37	92.69	24.2	19.91	7.16	11.1	105.44	573.28	37.03	0	13.13	38.01	47.4	8.98	357.74	11.6	118.02	12.82	8.56
75	28.12	17.35	35.95	41.3	194.23	50.22	15.24	35.93	9.58	8.37	35.32	613.37	31.14	8.42	9.05	31.09	84.52	0	1097.43	14.68	164.05	21.05	10.98
76	243.97	71.42	91.66	34.98	156.73	82.39	23.76	32.14	8.83	11.11	166.03	699.86	19.94	0	16.73	120.8	49.33	0	629.82	8.92	35.06	10.4	0
77	82.97	31.12	37.61	21.88	177.74	62.03	22.75	22.48	8.02	8.04	86	333.83	16.47	0	11.02	45.61	25.54	0	216.48	8.72	38.74	9.26	0
78	322.33	83.12	111.32	36.82	167.55	102.62	30.43	45.93	9.94	11.4	180.79	810.73	22.76	0	16.1	79.8	44.63	6.69	464.96	9.42	31.25	9.55	0
79	131.45	39.97	87.51	41.18	287.13	67.8	18.09	26.26	6.74	10.16	61.46	405.92	24.47	0	9.71	17.52	22.4	6.99	144.78	9.48	54.1	10.18	6.9
80	105.49	37.2	49.96	25.77	231.26	76.82	21.97	25.61	7.68	9.25	74.7	282.51	19.06	0	10.76	28.91	35.64	0	149.08	7.75	39.32	8.78	0
81	134.49	55.34	65.25	35.75	299.6	93.36	21.09	30.29	8.25	8.22	89.64	398.45	22.03	0	12.21	39.82	39.26	0	226.05	13.51	48.04	8.59	0
82	29.71	16.23	29.61	35.45	189.23	67.82	19.78	43.68	9.04	19.63	136.37	574.96	51.48	10.86	19.53	86.43	82.19	19.24	650.35	15.36	236.51	26.65	18.06
83	48.6	23.26	57.17	46	297.87	49.33	11.47	13.18	7.13	8.82	52.34	428.02	24.53	9.63	13.39	81.95	59.92	9.7	455.91	10	111.47	16.9	8.4
84	46.83	19.87	44.87	36.71	241.23	79.67	19.35	24.39	6.62	8.3	61.68	429.28	35.55	8.45	13.04	63.59	51.99	8.02	625.63	12.73	146.09	15.55	9.33
85	23.45	18.93	45.95	40.11	209.4	58.65	12.17	24.68	8.09	0	18.54	608.29	29.4	10.02	7.31	18.13	60.29	0	827.7	10.37	125.78	18.37	15.26
86	35	29.12	37.84	50.78	133.62	55.48	15.42	21.76	7.24	16.59	100.94	746.01	23.82	8.8	16.19	34.86	44.78	21.69	200.32	9.77	177.25	31.92	10.9
87	74.37	46.87	35.47	28.93	176.48	67.14	19.18	21.28	9.45	7.6	70.87	361.72	18.73	0	12.19	70.16	42.26	0	503.32	10.11	50.97	9.29	6.78
88	145.22	57.29	65.33	30.79	263.36	135.56	24.74	36.66	8.1	10.71	132.31	557.37	27.25	0	14.5	35.76	41.69	7	234.82	10.57	54.34	8.27	0
89	38.37	20.39	31.02	35.14	173.51	39.37	17.45	17.15	8.17	8.54	59.56	272.6	17.36	0	10.89	46.11	40.37	8.21	259.94	8.4	70.14	10.38	6.98
90	38.49	23.62	30.92	30.7	124.2	67.71	15.54	22.68	9.82	7.59	94.84	531.37	28.37	7.48	13.95	145.33	53.31	7.71	650.72	10.85	117.34	12.95	7.71
91	31.12	19.69	35.5	57.34	206.65	68.81	19.22	17.67	7.07	8.64	88.73	561.31	27.18	11.58	24.88	166.32	38.45	14.66	727.12	16.09	145.23	35.74	30.19
92	72.92	32.52	63.67	52.38	309.14	56.44	12.14	27.48	7.83	9.12	35.83	380.11	26.6	0	10.18	12.63	65.17	0	422.12	10.06	106.28	10.86	7.03
93	17.62	12.73	17.47	20.37	93.92	32.17	9.98	10.88	7.2	8.39	47.58	188.29	16.81	0	14.11	72.79	51.11	9.68	433.16	9.8	109.83	17.12	8.27
94	24.83	15.71	28.36	32.8	136.74	56.21	14.27	31.17	7.57	8.64	29.83	751.09	29.66	10.2	7.09	13.25	37.82	0	686.21	10.66	114.53	21.58	16.55
95	80.95	34.26	91.72	49.68	314.82	72.07	26.34	32.46	7.03	10.96	112.53	534.54	35.63	0	12.03	49.46	39.21	7.77	313.45	10.69	105.73	10.15	0
96	113.6	50.99	96.38	61.44	239.74	171.24	24.94	51.07	8.08	8.48	57.13	1457.37	63.81	15.9	12.99	25.3	37.75	7.14	411.26	18.04	142.54	18.65	15.39
97	53.91	31.31	46.13	52.76	250.82	56.47	21.16	20.82	7.46	10.15	71.08	322.11	23.97	0	9.25	21.07	29.25	8.37	107.9	9.5	78.43	10.72	7.65
98	33.41	31.51	27.13	35.31	105.78	118.81	28.14	59	6.95	30.96	239	1019.76	68.6	11.73	20.85	21.39	39.6	23.67	121.29	16.23	249.58	19.84	13.9
99	29.53	19.1	36.4	28.8	122.94	75.57	17.7	27.8	7.14	7.37	29.79	963.27	40.97	13.82	9.84	12.3	40.63	0	486.9	12.34	125.58	18.41	11.86
100	45.78	24.5	38.06	35.69	184.5	31.58	11.05	11.24	7.29	7.82	55.17	266.55	17.97	0	16.1	87.11	82	9.36	565.37	8.24	100.37	12.56	0
101	53.99	29.93	68.07	59.85	315.18	57.41	16.59	19.51	7.33	19.79	116.45	374.04	29.29	0	14.73	20.77	35.35	38.45	320.63	12.88	178.01	24.86	12.75
102	48.87	20.65	48.87	39.96	164.79	80.48	23.07	77.58	7.65	12.6	163.63	833.63	34.07	9.1	15.12	126.34	38.39	9.29	939.59	9.36	95.38	17.1	9.67
103	11.96	8.78	11.37	16.94	66.42	39.96	12.4	14.55	7.13	7.65	68.13	372.06	19.94	7.5	16.16	87.62	36.14	8.55	510.58	9.02	113.55	12.51	7.92
104	30.94	18.93	30.44	38.58	193.96	32.5	13.14	16.8	8.15	7.84	47.31	233.41	18.46	0	11.14	54.24	51.06	8.79	364.14	9.06	99.24	11.95	6.74
105	27.24	14.48	21.65	20.1	92.38	49.65	19.58	35.84	7.15	11.15	86.02	608.85	26.71	0	12.16	76.95	32	7.48	557.47	7.96	88.81	14.6	10.07
106	98.49	37.02	43.04	16.23	79.86	147.27	16.25	26.77	11.98	7.72	116.34	931.76	39.15	8.58	15.95	416.21	53.28	7.96	1953.79	12.34	77.85	15.68	0
107	217.65	74.55	87.66	28.02	148.35	282.6	27.97	42.04	8.74	10.09	194.19	1864.8	76.81	0	21.15	80.11	35.5	0	733.22	13.8	80.78	11	6.42
108	116.98	43.52	48.87	17.62	86.11	168.85	18.27	30.56	10.68	7.31	128.67	1182.04	38.61	0	16.7	249.59	47.34	0	1645.06	12.02	73.83	12.41	0
109	23.56	16.04	21.51	25.3	99.91	60.65	29.08	27.6	6.99	9.28	88.4	735.06	27.04	7.88	9.81	34.66	22.54	8.19	352.6	10.55	82.61	14.37	9.59
110	38.22	15.86	32.68	23.2	120.6	78.55	22.37	34.65	8.12	9.68	88.31	459	28.73	9.36	13.17	103.11	34.74	7.49	609.22	14.22	96.27	15.84	12.34
111	39.55	21.63	36.18	40.35	214.88	36.4	16.25	20.06	8.06	7.69	54.25	255.92	19.32	0	10.29	47.68	36.86	7.6	296.59	9.72	82.2	10.65	0
112	85.87	47.12	42.42	29.88	204.82	88.05	22.27	19.9	7.16	10.08	98.58	420.54	21.38	0	11.71	40.92	25.43	0	204.11	9.98	46.5	8.83	0
113	53.17	27.32	46.2	48.29	258.26	44.74	18.25	18.92	7.48	8.46	74.43	320.99	21.44	0	10.77	33.78	33.34	7.99	229.85	10.07	76.59	10.74	6.91
114	50.44	27.93	51.45	46.8	181.56	53.59	18.11	43.22	7.68	0	26.29	799.76	30.3	0	10.78	18.66	36.72	0	693.08	12.11	142.55	18.92	8.92
115	83.64	47.27	63.5	58.75	239.51	70.01	21.1	25.9	7.29	10.91	122.04	785.36	30.88	8.77	15.02	63.33	56.35	8.94	646.02	10.11	106.03	11.59	0
116	36.43	21.76	17.09	10.36	27.48	201.09	17.28	34.85	9.07	14.5	255.97	2027.2	45.59	0	26.18	13.55	61.97	10.35	410.23	11.84	106.47	15.99	0
117	86.62	80.34	34.94	26.67	67.18	324.54	42.2	83.19	10.27	46.57	882.29	2994.71	77.1	20.28	39.77	228.5	59.38	20.51	683.32	20.56	164.11	23.05	9.94
118	27.38	16.37	25.34	36.87	156.81	38.79	10.14	28.34	7.67	9.63	18.32	411.83	16.71	8.5	0	10.32	27.5	7.19	290.67	8.83	68.19	20.22	15.66
119	7.32	10.16	8.7	15.07	19.55	119.81	10.91	67.29	10.57	11.67	146.45	4293.18	75.89	26.76	19.22	11.75	55.32	14.58	779.58	30.62	455.19	115.8	45.99
120	11.12	8.52	7.99	7.15	22.03	103.79	18.97	19.97	9.03	8.74	129.02	487.16	22.31	0	13.87	132.52	36.98	7.28	401.59	10.43	61.2	12.23	8.26
121	9.7	13.13	10.62	21.03	27.37	141.58	11.79	76.32	9.34	16.7	159.01	4103.21	84.19	26.51	16.99	13.91	64.26	17.33	866.54	19.38	439.74	100.46	44.97
122	18.66	13.1	24.25	38.32	153.73	36.99	10.93	29.23	8.48	9.88	31.12	457.47	26.83	8.4	0	20.42	56.62	0	1007.94	8.49	127.73	23.4	12.3
123	106.31	67.3	50.02	39.49	241.54	97.18	20.19	24.85	9.65	8.06	80.61	417.34	23.52	0	13.69	49.1	50.59	6.84	383.51	10.63	57.83	8.61	0
124	69.85	45.18	32.98	27.77	170.59	75.49	18.93	23.14	9.36	7.2	74.28	364.29	19.77	0	12.55	69.55	41.49	0	464.75	9.63	53.94	8.95	0
125	10.98	8.14	7.96	6.97	22.81	87.8	12.5	13.17	8.42	7.38	79.16	284.71	20.41	0	17.56	203.09	50.59	7.26	625	9.19	69.64	11.59	6.81
126	53.54	39.29	23.95	15.7	45.32	180.72	23.46	34.73	9.86	35.73	486.85	1633.99	58.6	0	36.52	89.82	99.61	17.07	540.82	10.38	94.63	11.28	0
127	7.95	7.2	8	11.23	22.21	29.6	17.83	22.66	7.51	9.42	70.86	404.82	18.88	7.35	14.83	95.16	33.57	9.3	701.25	9.85	112.23	21.05	16.17
128	16.95	12.59	18.93	29.82	102.69	27.74	14.57	26.33	7.81	8.03	68.93	350.82	18.22	0	12.04	87.14	28.58	12.13	402.8	8.94	97.44	23.63	12.19
129	13.19	9.3	8.91	7.35	28.79	93.95	15.58	17.99	8.36	8.14	105.02	391.77	21.25	0	15.11	140.21	46.21	7.11	484.66	9.34	67.49	12.96	13.91
130	67.26	53.36	32.91	35.08	178.13	74.34	19.91	18.56	8.65	7.48	85.43	374.65	19.42	0	13.91	102.4	43.28	7.31	494.7	9.77	73.32	9.6	0
131	11.85	15.28	15.2	37.79	69.2	48.04	16.72	13.09	6.41	29.77	255.12	1240.92	29.69	12.27	16.49	42.55	25.68	35.06	411.52	12.23	206.52	47.2	14.53
132	56.25	43.81	25.33	17.03	48.81	223.11	25	43.07	9.93	34.25	581.83	2054.4	47.52	0	39.01	103.06	101.87	16.64	647.36	11.26	113.71	12.77	0
133	14.79	11.9	13.54	22.34	70.55	53.19	21.19	16.13	7.23	8.72	89.53	620.03	21.58	8.25	13.54	80.34	24.9	9.9	506.44	9.58	84	17.66	13.86
134	19.23	11.43	11.97	9.07	46.03	149.58	26.8	29.5	7.67	10.37	133.05	589.83	32.17	0	13.7	63.52	46.18	7.29	270.86	10.42	77.77	8.98	0
135	15.76	16.6	16.67	29.16	52.32	69.7	19.57	15.08	11.17	27.19	210.03	1219.34	42.17	14.22	90.23	479.33	133.91	28.06	1673.33	16.71	164.16	36.42	25.56
136	20.34	15.08	26.42	28.51	115.56	31.29	20.41	34.57	7.18	10.28	81.23	574.65	20.81	0	10.26	46.33	29.68	8.6	359.57	10.46	100.47	19.94	10.03
137	19.82	11.72	12.69	10.2	57.23	122.92	26.55	31.14	6.76	10.79	144.39	604.46	27.56	0	12.04	37.06	28.57	6.82	188.83	8.33	60.18	8.5	0
138	15.3	9.8	10.27	8.24	39.33	116.07	24.13	26.91	7.76	9.02	123.28	508.72	25.97	0	12.8	60.78	38.18	0	304.4	10.53	64.44	8.44	0
139	10.74	9.22	13.08	25.42	81.2	32.98	14.31	20.73	8.65	6.16	13.73	507.1	21.93	8.49	6.6	14.92	61.85	7.86	588.91	8.87	130.83	23.2	15.72
140	7.49	7.54	7.58	11.86	23.05	53.17	30.52	32.79	9.14	12.51	243.05	811.02	30.25	8.59	24.17	296	61.26	15.49	1317.41	12.24	222.24	32.72	16.27
141	24.99	14.27	21.59	20.92	98.68	42.72	20.03	39.66	8.67	11.03	85.75	519.17	21.57	0	12.11	92.97	36.43	7.77	713.16	8.51	89.97	13.62	6.88
142	20.51	17.4	22.27	30.87	67.6	48.84	19.3	18.16	7.14	24.89	170.97	1020.47	27.93	8.43	11.6	26.49	22.63	22.89	137.25	12.14	163.39	37.53	9.82
143	68.23	44.33	34.67	30.07	184.65	71.48	20.24	19	6.86	8.53	88.53	361.9	18.67	0	11.21	44.85	25.5	0	220.31	9.67	45.36	8.65	0
144	22.19	21.32	24.55	38.67	78.21	51.38	19.69	22.52	7.5	23.6	166.61	1014.85	30.38	8.59	11.81	25.42	25.54	23.27	166.66	12.53	192.7	39.84	10.73
145	20.43	19.9	25.29	22.28	85.08	80.88	36	103.3	18.36	13.4	211.64	944.2	49.04	12.45	20.55	181.65	71.57	10.47	866.65	14.71	207.73	14.26	0
146	25.75	22.59	28.8	29.24	107.07	106.52	33.8	87.17	16.03	13.71	250.75	1122.14	61.7	13.97	25.97	231.79	92.55	13.02	1169.63	18.68	340.69	22.94	10.33
147	6.6	6.06	6.6	8.45	19.15	22.94	21.44	33.95	7.04	10.61	61.16	254.55	20.37	0	9.01	107.55	20.85	7.85	503.82	8.61	95.55	13.93	0
148	0	0	0	0	0	340.12	21.13	105.22	10.55	60.13	460.11	3035	84.57	24.03	22.37	12.3	32.24	26.05	286.44	12.49	53.12	30.59	11.59
149	0	0	0	0	0	182.47	28.94	21.68	8.01	41.74	492.81	1661.32	51.75	18.57	23.92	57.96	38.62	28.68	304.81	20.86	128.76	22.07	17.79
150	0	0	0	0	6.86	67.11	15.64	35.83	6.96	8.85	155.64	526.55	14.61	0	12.83	85.89	24.61	7.19	308.08	9.45	42.07	9.87	0
151	0	0	0	0	0	128.25	21.74	27.61	8.08	89.32	295.35	1402.88	29.47	23.1	9.52	12.19	9.78	83.72	68.61	26.92	162.84	43.66	134.13
152	0	0	0	0	0	125.33	34.67	17.76	8.92	47.34	677.78	2004.44	56.85	28.94	28.41	98.71	28.8	103.79	444.32	32.91	305.17	164.88	125.7
153	0	0	0	0	0	263.1	21.53	12.84	14.34	18.14	77.15	1072.82	54.62	27.77	24.24	38.55	90.63	24.58	1132.73	12.65	126.96	25.7	44.59
154	0	0	0	0	0	275.95	39.47	48.05	14	53.58	263.57	1178.59	41.44	29.14	25.7	44.16	23.97	53.3	188.77	36.4	165.32	23.15	66.07
155	0	0	0	0	0	288.73	44.08	57.7	29.81	61.62	569.46	1789.3	48.69	31.87	47.76	205.3	41.68	55.29	521.89	46.96	273.02	46.03	79.58
156	0	0	0	0	0	307.79	29.97	62.79	19.95	65.73	519.91	1874.46	47.9	36.89	37.15	125.33	30.15	62.01	422.28	46.59	269.16	42.05	96.09
157	0	0	0	0	0	64.79	18.4	21.01	8.78	9.21	88.11	509.64	26.4	14.48	21.87	234.3	28.67	12.38	849.4	18.48	239.63	47.82	88.89
158	0	0	0	0	6.4	96.1	21.67	11.32	7.72	40.8	268.31	952.82	47.32	18.69	17.33	33.61	17.92	67.23	272.84	26.76	285.74	55.97	85.9
159	0	0	0	0	0	68.04	20.27	11.16	12.41	39.35	413.31	1194.27	34.09	16.93	35.69	147.69	21.84	48.96	392.38	26.75	343.48	93.22	83.33
160	0	0	0	0	0	114.54	24.5	20.81	7.23	32.43	323.39	1192.46	33.56	10.39	14.97	52.85	26.96	18.87	147.38	14.86	70.26	15.48	10.09
161	0	0	0	0	0	88.62	28.68	15.03	7.99	40.96	515.4	1556.21	41.36	22.79	24.34	79.58	20.99	87.81	340.94	27.56	214.13	125.68	91.92
162	0	0	0	0	0	745.92	23.07	26.31	20.82	15.29	267.59	2786.15	152.2	47.37	16.58	10.45	28.94	11.24	103.2	59.19	224.64	47.21	49.07
163	0	0	0	0	0	164.32	33.33	22.09	8.69	43.6	391.3	1552.16	49.08	15.16	20.95	47.43	32.92	28.7	283.8	12.18	116.36	20.11	13.84
164	0	0	0	0	0	80.06	24.9	13.54	10.24	34.3	418.27	1474.5	38.3	18.26	27.3	109.08	21.9	44.32	399.72	18.8	313.16	72.37	67.77
165	0	0	0	0	0	543.71	14.86	20.16	27.94	10.57	153.41	5030.07	106.88	63.19	13.76	6.35	24.87	12.01	584.09	16.76	294	112.47	114.26
166	0	0	0	0	0	285.66	27.96	90.52	9	24.3	451.34	1999.51	52.21	0	29.71	106.87	67.82	13.98	589.3	17.01	183.96	12.06	7.03
167	6.61	6.17	5.9	5.74	7.43	246.13	26.63	71.11	8.13	27.31	401.34	1680.61	45.18	0	25.85	54.66	60.61	13.65	382.36	16.63	130.87	11.22	6.7
168	0	6.8	6.21	9.13	9.92	87.65	42.15	227.3	11.49	59.64	529.51	2550.69	93.17	18.85	29.41	80.07	62.59	71.96	977.54	18.19	721.98	154.76	29.96
169	0	0	0	0	0	120.2	35.68	18.85	9.26	49.62	648.69	1862.92	61	29.79	31.65	98.64	33.07	117.67	456.51	42.7	320.15	139.84	122.82
170	0	0	0	0	0	61.09	23.6	26.68	0	10.42	137.48	611.67	27.42	9.64	9.71	79.72	20.36	12.29	228.07	12.81	105.9	21.27	20.32
171	0	0	0	0	6.61	37.68	29.77	21.8	8.02	8.26	68.95	479.55	20.46	9.43	15.52	79.5	28.23	11.23	437.68	10.74	104.44	26.18	19.78
172	0	0	0	0	0	307.91	35.63	76.99	10.13	52.92	854.08	3091.06	69.62	27.9	29.33	125.85	32.9	29.97	497.38	21.87	174.91	30.72	20.53
173	5.94	5.79	6.07	6.07	8.04	29.15	14.51	9.3	6.7	9.19	74.34	613.53	13.67	0	17.12	107.74	35.89	11.78	710.69	12.29	127.11	25.16	16.16
174	0	0	0	0	6.49	212.27	30.17	17.31	9.16	29.86	258.04	1006.19	34.39	15.83	31.01	164.61	29.57	20.58	520.26	20.75	112.49	16.26	20.9
175	6.52	5.85	6.01	6.26	8.54	78.88	26.59	11.48	7.01	13.91	279.7	763.67	34.95	14.01	13.02	120.42	16.75	19.76	339.8	20.7	199.61	35.42	33.4
176	0	0	0	0	0	75.7	22.75	18.29	10.7	19.97	366.49	685.56	27.88	11.94	32.69	863.02	36.78	22.11	1038.14	15.43	78.43	36.51	16.44
177	0	0	0	0	0	62.07	17.57	19.23	9.44	8.11	98.74	554.93	23.52	11.58	15.48	199	22.5	13.75	653.03	17.34	205.97	52.38	52.88
178	0	0	0	0	0	38.86	26.03	26.51	7.51	9.22	65.25	349.41	14.09	11.79	11.05	184.48	13.28	15.01	313.5	28.13	124.26	47.07	86.53
179	9.56	7.37	7.07	0	11.37	110.3	24.03	18.29	6.34	10.02	97.14	623.4	23.1	0	12.37	62.14	24.56	7.27	552.42	9.66	55.78	8.74	0
180	0	0	0	0	0	88.01	23.85	14.36	6.59	38.26	201.49	909.73	44.82	19.38	15.5	25.09	15.54	66.98	198.22	27.82	301.95	60.34	98.73
181	0	0	0	0	0	93.14	32.02	13.43	7.57	10.01	170.11	682.16	26.06	13.49	15.04	185.61	19.7	12.24	542.51	16.98	162.44	25.84	46.88
182	0	0	0	0	6.94	82.1	40.09	10.73	8.27	11.38	87.38	610.13	13.7	13.54	16.29	88.49	13.29	12.48	372.98	17.62	91.16	18.26	47.72
183	0	0	0	0	0	174.4	16.41	68.16	8.14	31.47	159.31	908.71	42.59	15.5	13.82	26.87	14.24	15.23	154.56	9.68	69.26	15.94	16.04
184	0	0	0	0	0	38.52	19.96	13.42	8.52	9.31	77.66	370.87	12.05	12.03	14.54	151.87	14.22	16.94	267.49	28.92	118.82	45.43	94.71
185	6	5.9	6.07	6.95	12.36	37.48	10.62	13.79	8.74	0	6.8	403.69	21.67	8.71	11.13	21.09	62.92	7.61	857.76	9.08	198.35	21.08	13.83
186	0	0	6.21	0	9.62	38.77	17.03	38.82	7.47	13.75	112.48	510.67	33.64	8.63	14.3	112.58	43.56	10.44	776.27	10.67	140.15	19.93	0
187	0	0	0	0	0	138.97	12.24	11.29	7.8	0	7.49	457.3	23.52	13.18	0	10.84	47.69	8.36	772.59	8.48	114.96	12.17	20.32
188	0	0	0	0	0	47.58	28.41	12.72	9.12	7.46	76.58	345.84	16.16	9.11	10.74	141.86	18.72	10.3	459.68	16.75	166.96	30.8	37.07
189	0	0	0	0	0	64.02	33.43	12.82	8	9.1	85.65	435.01	19.2	9.55	10.23	75.06	15.38	9.55	274.66	13.54	121.99	19.9	30.46
190	0	0	0	0	0	65.44	42.67	44.18	8.28	11.42	118	951.09	38.14	12.28	9.7	0	14.99	10.61	295.46	11.97	207.66	46.72	0
191	0	0	0	0	0	37.32	17.86	21.46	8.44	9.68	103.78	319.82	22.39	8	11.57	193.57	19.19	11.31	467.17	14.11	126.4	27.78	24.35
192	0	0	0	0	0	46.79	21.3	20.34	7.27	8.86	107.66	396.63	21.18	8.04	9.75	88.8	14.78	9.48	279.67	11.27	90.87	19.92	17.98
193	6.17	5.91	5.85	0	6.73	112.05	31.83	13.73	8.14	19.09	308.84	1094.78	28.05	8.81	18.76	184.59	24.9	11.2	877.44	11.94	75.94	13.77	0
194	6.02	0	6.58	5.99	8.24	45.82	18.29	29.78	8.6	12.73	181.78	655.4	26.9	8.95	17.42	207.58	46.92	12.53	844.02	12.97	143.48	26.39	11.34
195	7.36	7.43	7.63	10.71	23.38	46.43	28.13	34.93	7.57	15.16	199.24	596.02	29.92	8.53	23.51	242.44	59.68	14.79	902.63	10.13	154.08	20.11	11.47
196	0	0	0	0	0	64.1	25.9	13.87	7	10.58	118.24	418.17	21.67	12.57	17.03	179.15	20.65	11.97	452.61	16.05	141.44	23.06	41.54
197	7.19	6.33	7.2	6.81	13.3	54.49	17.25	15.14	8.75	7.26	65.3	463.78	21.14	12.66	17.6	210.49	25.61	11.35	950.43	16.17	204.76	46.39	75.65
198	0	0	6.36	7.29	12.65	33.58	19.38	16.55	6.79	9.31	73.69	751.52	20.13	9.34	12.9	61.85	29.72	10.31	626.91	12.03	148.67	26	13.68
199	0	0	0	0	6.29	38.34	20.25	30.78	7.27	10.27	125.57	508.15	26.6	10.29	13.45	163.14	26.8	11.06	617.11	13.84	128.17	36.7	23.63
200	6.68	0	6.59	0	11.2	53.89	21.42	34.36	7.35	11.06	111.79	688.5	31.69	0	14.99	92.78	52.71	7.88	874.31	15.47	173.14	18.05	8.79
201	0	0	0	0	0	53.65	20.75	40.51	6.93	10.67	110.61	528.23	20.89	9.11	11.13	75.85	15.39	8.78	326.97	11.11	97.17	21.61	23.8
202	0	0	0	0	0	214.96	25.88	15.74	8.65	27.25	175.4	806.77	35.94	17.9	30.28	142.13	36.83	23.88	569.68	25.62	148.31	16.61	26.81
203	6.35	0	0	0	11.72	78	18.99	10.72	6.29	9.27	135.83	666.76	31.84	10.82	11.77	148.89	24.69	11.03	752.42	17.1	201.76	32.38	27.99
204	0	0	0	0	6.48	108.74	29.7	26.19	9.79	24.07	379.82	823.67	38.87	14.92	31.67	442.88	36.22	24.51	822.5	17.08	110.84	25.19	24.76
205	0	0	0	0	0	86.89	36.5	10.3	7.9	11.02	83.15	543.18	14.93	14.12	15.88	94.96	12.06	11.86	331.88	16.61	88.38	16.06	49.07
206	0	0	0	0	0	34.99	34.83	66.52	9.23	12.78	115.21	711.66	28.1	9.18	12.64	79.32	18.2	12.43	455.18	12.51	220.72	47.19	41.26
207	0	0	0	0	0	44.98	21.48	33.33	7.45	10.33	92.87	514.31	20.72	9.65	12.13	88.16	14.66	10.93	365.79	14.23	140.63	31.24	48.37

## Sheet: anthocyanins
	peak1	peak2	peak3	peak4	peak5	TA
1	64.3529	24.0923	65.488	37.3397	250.863	442.136
2	91.661	34.2088	40.1538	22.6087	161.207	349.839
3	99.1601	45.4826	77.9285	76.742	409.423	708.736
4	138.097	50.7286	100.237	62.3206	394.997	746.38
5	113.433	41.3801	113.001	92.4617	514.45	874.725
6	76.428	35.2952	69.9528	63.8129	397.768	643.257
7	85.7565	72.5751	75.8593	104.169	316.922	655.282
8	103.894	46.8137	105.318	79.97	392.476	728.472
9	121.296	60.0489	101.065	91.7714	474.681	848.862
10	75.7474	34.9559	72.9278	48.541	330.013	562.185
11	63.8411	37.5337	52.7423	50.3158	215.885	420.318
12	83.5953	32.1985	39.6881	18.0983	86.4179	259.998
13	129.756	54.8937	126.69	73.913	450.525	835.778
14	57.4772	36.4259	63.2212	80.5828	325.322	563.029
15	158.473	52.8903	135.799	57.0178	380.855	785.035
16	52.837	22.9686	63.7839	44.8812	295.393	479.864
17	63.4654	22.2277	29.1189	16.8611	115.095	246.768
18	104.292	25.0424	91.5309	38.3428	295.533	554.741
19	87.9682	39.9619	39.0559	19.2885	132.759	319.033
20	70.8427	24.1049	52.0021	31.0774	178.172	356.199
21	54.3839	32.4064	68.0944	56.7093	270.502	482.096
22	243.371	159.583	94.9533	50.6838	172.964	721.555
23	173.025	57.9238	77.2977	29.0343	205.143	542.423
24	131.983	62.0607	104.102	62.9085	422.454	783.508
25	91.8025	41.9417	44.1876	22.2606	99.1063	299.299
26	386.384	111.257	148.343	46.4433	269.417	961.844
27	423.319	138.313	173.18	58.0837	340.716	1133.61
28	65.3911	35.5795	76.4219	59.7092	346.541	583.643
29	186.611	96.9773	126.76	89.2193	419.906	919.473
30	64.9224	31.7227	41.9058	31.3617	138.371	308.283
31	40.4572	32.2729	33.361	43.3065	120.029	269.427
32	59.0313	31.9052	47.4515	50.5788	250.936	439.903
33	38.3656	44.4748	30.4382	43.629	99.8254	256.733
34	111.586	50.3881	85.9711	54.1462	296.407	598.498
35	98.1362	41.4047	86.2338	53.0225	353.614	632.411
36	104.517	47.1892	111.596	87.7131	470.129	821.144
37	40.4024	37.029	46.1985	65.8856	170.731	360.247
38	190.84	58.1868	125.078	57.4919	395.337	826.933
39	140.74	51.7084	65.9728	34.0148	301.84	594.276
40	45.6508	23.2792	41.6952	46.0253	280.463	437.114
41	87.5859	63.052	79.3733	96.6315	349.621	676.264
42	34.113	13.5209	27.3263	23.3576	112.807	211.125
43	27.4055	18.2127	25.541	32.3611	115.923	219.443
44	120.615	37.6884	50.0808	22.5312	194.375	425.291
45	40.0906	34.4815	30.9551	42.2844	129.501	277.312
46	43.8063	20.3688	40.3409	29.6079	158.411	292.535
47	40.4308	27.113	50.4864	67.8187	307.076	492.925
48	127.829	53.2007	104.559	69.283	463.115	817.987
49	92.3977	39.1969	75.4017	53.0823	341.473	601.552
50	65.6372	18.7556	43.5839	14.0542	61.4412	203.472
51	64.8452	26.2609	47.1789	25.7232	147.256	311.264
52	54.0582	20.0675	36.9345	26.5725	128.349	265.982
53	194.727	89.1011	73.9276	37.0986	227.646	622.501
54	62.9282	28.838	47.8593	33.5685	176.181	349.375
55	19.3489	10.0677	22.7318	19.1468	102.329	173.624
56	85.0027	47.7071	67.1451	48.8099	210.205	458.87
57	67.6035	30.5612	55.2963	37.5514	215.44	406.453
58	83.8654	36.1119	70.0676	46.3766	287.366	523.787
59	129.473	44.2931	102.18	61.0639	404.031	741.042
60	23.0681	15.3081	20.6343	23.7672	98.5936	181.371
61	76.0395	50.2689	32.989	26.705	142.707	328.709
62	27.3226	15.3705	22.3409	23.47	123.423	211.927
63	37.8118	22.1687	32.6229	37.5205	187.322	317.446
64	41.1729	22.7693	47.3677	50.9122	225.388	387.61
65	55.2351	33.0817	63.5447	76.415	309.56	537.836
66	58.9529	28.0599	50.913	50.499	249.479	437.904
67	44.5762	22.3503	49.1638	46.4811	243.143	405.714
68	157.668	39.7744	85.1013	37.2178	224.712	544.474
69	81.8302	28.3991	37.3489	15.0676	74.7212	237.367
70	90.4096	32.0858	98.3106	60.6276	380.725	662.159
71	147.089	42.9903	84.0367	40.7329	235.785	550.634
72	153.501	48.4879	62.7092	20.9341	117.213	402.846
73	120.968	42.7232	51.5055	18.5598	93.2053	326.962
74	123.492	57.4142	102.962	88.3438	502.371	874.583
75	28.1222	17.3457	35.9507	41.2992	194.235	316.952
76	243.972	71.4161	91.6606	34.9808	156.73	598.759
77	82.9712	31.1249	37.609	21.8772	177.744	351.326
78	322.335	83.1218	111.316	36.8218	167.548	721.142
79	131.454	39.9664	87.51	41.1762	287.129	587.236
80	105.492	37.2019	49.9622	25.7702	231.258	449.684
81	134.493	55.3352	65.2533	35.7527	299.597	590.431
82	29.7139	16.2263	29.6136	35.4492	189.232	300.235
83	48.5972	23.2629	57.1732	45.9986	297.865	472.897
84	46.8253	19.8749	44.8728	36.7141	241.234	389.521
85	23.4492	18.9271	45.9505	40.1051	209.399	337.831
86	35.0013	29.1188	37.8379	50.7791	133.624	286.361
87	74.3693	46.868	35.4658	28.9308	176.478	362.112
88	145.217	57.2939	65.3289	30.7929	263.355	561.987
89	38.3655	20.393	31.0228	35.1437	173.511	298.436
90	38.494	23.621	30.9151	30.698	124.198	247.927
91	31.1176	19.6859	35.4973	57.3409	206.649	350.291
92	72.9227	32.5234	63.6711	52.3839	309.135	530.636
93	17.6198	12.7251	17.471	20.3723	93.9187	162.107
94	24.8279	15.7056	28.3631	32.798	136.74	238.435
95	80.9484	34.2581	91.7238	49.6758	314.823	571.429
96	113.603	50.9948	96.376	61.4435	239.741	562.158
97	53.9072	31.3104	46.1319	52.7551	250.817	434.921
98	33.4113	31.5125	27.1267	35.3138	105.78	233.144
99	29.5288	19.0966	36.3982	28.7957	122.936	236.755
100	45.7837	24.5038	38.0632	35.6934	184.5	328.544
101	53.9943	29.9338	68.0727	59.8482	315.181	527.03
102	48.8663	20.6519	48.8652	39.9588	164.787	323.13
103	11.9568	8.77556	11.3692	16.9398	66.4152	115.457
104	30.9359	18.9336	30.4426	38.5773	193.963	312.852
105	27.2367	14.4773	21.6541	20.0969	92.3797	175.845
106	98.4941	37.0196	43.0431	16.2305	79.8646	274.652
107	217.647	74.5548	87.656	28.0201	148.348	556.225
108	116.977	43.5166	48.8695	17.624	86.1062	313.094
109	23.5551	16.043	21.513	25.2955	99.9057	186.312
110	38.2242	15.8574	32.6829	23.204	120.604	230.572
111	39.5544	21.6262	36.1774	40.3485	214.878	352.585
112	85.8679	47.116	42.4194	29.8848	204.824	410.112
113	53.1739	27.322	46.2031	48.2902	258.256	433.245
114	50.4362	27.932	51.4522	46.7966	181.558	358.175
115	83.6369	47.2685	63.5037	58.7525	239.505	492.667
116	36.434	21.761	17.0907	10.3597	27.4849	113.13
117	86.6189	80.3387	34.9444	26.6676	67.1768	295.746
118	27.3778	16.3735	25.3449	36.875	156.812	262.783
119	7.31986	10.163	8.70022	15.0702	19.5467	60.8
120	11.1218	8.51658	7.99086	7.14853	22.031	56.8087
121	9.69546	13.1286	10.621	21.0347	27.3687	81.8485
122	18.6599	13.0989	24.2471	38.3231	153.733	248.062
123	106.312	67.3011	50.0249	39.4889	241.538	504.665
124	69.8499	45.18	32.9768	27.7657	170.59	346.363
125	10.9823	8.1393	7.95595	6.97147	22.8068	56.8558
126	53.5366	39.2939	23.9528	15.6992	45.3169	177.799
127	7.95348	7.19742	8.00231	11.2326	22.2063	56.5921
128	16.9471	12.5895	18.9306	29.8169	102.693	180.977
129	13.194	9.29566	8.90865	7.35362	28.7946	67.5466
130	67.2643	53.3637	32.9128	35.0837	178.127	366.751
131	11.8483	15.282	15.2048	37.788	69.2003	149.323
132	56.2477	43.8145	25.3321	17.0333	48.8082	191.236
133	14.7911	11.897	13.5371	22.337	70.5506	133.113
134	19.2308	11.4349	11.9724	9.07168	46.0303	97.7401
135	15.76	16.6029	16.6719	29.1611	52.3191	130.515
136	20.344	15.0797	26.4204	28.5098	115.555	205.909
137	19.8216	11.7237	12.6884	10.1964	57.2312	111.661
138	15.301	9.79566	10.2656	8.24288	39.3289	82.934
139	10.7439	9.21893	13.078	25.4162	81.2003	139.657
140	7.49477	7.53702	7.58149	11.8593	23.0472	57.5198
141	24.9906	14.271	21.5918	20.92	98.6794	180.453
142	20.5135	17.404	22.2663	30.8672	67.5979	158.649
143	68.2336	44.3305	34.6738	30.0678	184.651	361.956
144	22.1922	21.3198	24.5474	38.6745	78.2136	184.948
145	20.4344	19.9042	25.2926	22.2785	85.0848	172.995
146	25.7503	22.5919	28.7957	29.2386	107.07	213.446
147	6.6012	6.06472	6.59641	8.44627	19.1515	46.8601
148	0	0	0	0	0	0
149	0	0	0	0	0	0
150	0	0	0	0	6.85572	6.85572
151	0	0	0	0	0	0
152	0	0	0	0	0	0
153	0	0	0	0	0	0
154	0	0	0	0	0	0
155	0	0	0	0	0	0
156	0	0	0	0	0	0
157	0	0	0	0	0	0
158	0	0	0	0	6.40218	6.40218
159	0	0	0	0	0	0
160	0	0	0	0	0	0
161	0	0	0	0	0	0
162	0	0	0	0	0	0
163	0	0	0	0	0	0
164	0	0	0	0	0	0
165	0	0	0	0	0	0
166	0	0	0	0	0	0
167	6.60815	6.1681	5.90474	5.73657	7.43084	31.8484
168	0	6.79549	6.21266	9.12682	9.91717	32.0521
169	0	0	0	0	0	0
170	0	0	0	0	0	0
171	0	0	0	0	6.60698	6.60698
172	0	0	0	0	0	0
173	5.94492	5.78944	6.07423	6.07497	8.04162	31.9252
174	0	0	0	0	6.49479	6.49479
175	6.519	5.84904	6.01184	6.25934	8.53737	33.1766
176	0	0	0	0	0	0
177	0	0	0	0	0	0
178	0	0	0	0	0	0
179	9.557	7.36936	7.06569	0	11.3727	35.3648
180	0	0	0	0	0	0
181	0	0	0	0	0	0
182	0	0	0	0	6.94297	6.94297
183	0	0	0	0	0	0
184	0	0	0	0	0	0
185	6.00042	5.89601	6.07494	6.94564	12.3624	37.2794
186	0	0	6.20852	0	9.61948	15.828
187	0	0	0	0	0	0
188	0	0	0	0	0	0
189	0	0	0	0	0	0
190	0	0	0	0	0	0
191	0	0	0	0	0	0
192	0	0	0	0	0	0
193	6.16705	5.91386	5.85296	0	6.72806	24.6619
194	6.0205	0	6.58285	5.98573	8.24179	26.8309
195	7.36125	7.42839	7.63387	10.712	23.3763	56.5118
196	0	0	0	0	0	0
197	7.19193	6.33478	7.20405	6.81093	13.2952	40.8369
198	0	0	6.35931	7.28933	12.6498	26.2985
199	0	0	0	0	6.29035	6.29035
200	6.6759	0	6.58835	0	11.2038	24.4681
201	0	0	0	0	0	0
202	0	0	0	0	0	0
203	6.34597	0	0	0	11.7163	18.0623
204	0	0	0	0	6.47934	6.47934
205	0	0	0	0	0	0
206	0	0	0	0	0	0
207	0	0	0	0	0	0

## Sheet: non-anthocyanin flavonoids
	quercetin derivatives	kaempferol derivatives	isorhamnetin derivatives	syringetin derivatives	myricetin derivatives	laricitrin derivatives	TF	TA	CI
1	759.368	1286.05	177.703	12.8644	56.4188	26.4797	2318.88	442.136	5.24472
2	782.248	662.785	80.2313	12.836	125.067	26.4368	1689.6	349.839	4.82966
3	550.222	502.295	127.128	18.6959	59.8406	36.7408	1294.92	708.736	1.82709
4	779.846	634.88	111.086	17.1795	67.0785	29.4031	1639.47	746.38	2.19657
5	1093.84	1289.2	175.63	21.5569	84.0752	35.6302	2699.93	874.725	3.0866
6	708.758	1055.3	148.4	19.3709	86.9358	31.482	2050.25	643.257	3.18729
7	871.688	1518.18	282.047	38.045	96.5367	54.3748	2860.87	655.282	4.36585
8	989.165	763.897	198.331	25.5421	80.622	53.3987	2110.96	728.472	2.89779
9	965.932	579.628	146.358	20.0131	103.874	39.5612	1855.37	848.862	2.18571
10	909.203	472.129	108.205	19.8618	81.7746	34.556	1625.73	562.185	2.89181
11	426.274	672.2	130.397	17.6636	39.8054	20.6798	1307.02	420.318	3.1096
12	672.532	764.928	40.1876	7.21106	62.6384	16.8142	1564.31	259.998	6.01663
13	613.116	655.962	153.424	24.4366	66.5798	33.9725	1547.49	835.778	1.85156
14	758.67	1085.64	195.68	27.042	77.4302	51.9774	2196.44	563.029	3.90112
15	695.896	454.39	127.37	12.2644	94.7686	36.2431	1420.93	785.035	1.81003
16	728.301	1063.85	174.185	12.4419	51.4321	32.2363	2062.44	479.864	4.29798
17	623.445	556.971	67.1796	9.72787	84.2355	20.3531	1361.91	246.768	5.51899
18	575.921	1015.16	144.728	19.373	53.7953	36.1629	1845.14	554.741	3.32613
19	526.646	536.786	54.2027	9.1664	56.2275	15.1205	1198.15	319.033	3.75556
20	610.555	937.754	148.517	22.6007	75.7597	39.0752	1834.26	356.199	5.14954
21	710.049	350.344	220.199	23.499	48.1732	29.4262	1381.69	482.096	2.86601
22	1687.66	2696.13	112.826	19.1203	143.808	50.8505	4710.39	721.555	6.52811
23	472.482	693.872	86.1174	12.9615	109.517	27.6787	1402.63	542.423	2.58586
24	305.631	261.706	86.8135	16.0262	38.7847	23.1682	732.129	783.508	0.934425
25	762.043	938.832	47.5109	17.4916	64.8773	18.1491	1848.9	299.299	6.17745
26	1157.02	576.339	67.2474	10.6616	149.986	34.1642	1995.42	961.844	2.07458
27	1110.62	558.559	74.63	11.2683	157.935	37.6538	1950.67	1133.61	1.72075
28	378.028	813.394	135.496	8.64306	30.2453	22.5376	1388.34	583.643	2.37876
29	518.061	512.95	99.1553	29.2561	69.3691	42.1064	1270.9	919.473	1.3822
30	793.103	1143.74	72.2074	17.8112	58.4194	18.676	2103.96	308.283	6.82476
31	917.49	1327.83	239.26	40.769	83.8135	44.0117	2653.18	269.427	9.84748
32	405.126	215.359	67.7905	16.7275	52.1105	26.0316	783.145	439.903	1.78027
33	2130.12	427.852	352.549	30.1197	107.406	63.8979	3111.95	256.733	12.1213
34	693.002	366.085	103.544	18.0512	91.1134	31.4158	1303.21	598.498	2.17747
35	1004.57	455.948	108.255	19.7737	89.6477	47.8013	1726	632.411	2.72923
36	861.087	585.561	187.329	23.9135	80.1641	58.6571	1796.71	821.144	2.18806
37	994.17	309.818	235.161	21.3815	60.7528	36.7277	1658.01	360.247	4.60243
38	792.688	397.691	91.2201	16.4896	89.4423	31.3375	1418.87	826.933	1.71582
39	630.318	318.87	57.6397	10.8362	96.15	22.3454	1136.16	594.276	1.91184
40	415.338	521.753	119.553	18.1621	57.3397	22.9217	1155.07	437.114	2.64249
41	986.787	1701.16	283.268	43.9148	105.246	66.0302	3186.4	676.264	4.71177
42	562.176	1128.29	115.191	27.9322	67.2571	30.6115	1931.45	211.125	9.14839
43	311.138	1422.99	139.425	26.7773	30.8453	25.2693	1956.45	219.443	8.91552
44	880.515	635.184	71.5819	10.7079	116.848	24.0071	1738.84	425.291	4.0886
45	2127.53	543.092	301.474	34.8996	128.759	71.0652	3206.82	277.312	11.5639
46	300.498	659.209	109.111	18.7768	28.759	17.0188	1133.37	292.535	3.87432
47	968.84	1756.58	277.075	44.0572	85.0942	47.8203	3179.47	492.925	6.45022
48	815.416	609.326	155.143	20.8877	95.2948	39.944	1736.01	817.987	2.1223
49	437.533	294.635	80.1575	16.6318	47.0563	23.3961	899.41	601.552	1.49515
50	1063.99	752.565	79.2176	9.24344	61.4449	22.9398	1989.4	203.472	9.77727
51	510.812	278.178	67.843	15.7883	68.8712	20.138	961.63	311.264	3.08944
52	577.403	378.156	80.8089	21.6292	76.3559	30.4159	1164.77	265.982	4.37913
53	735.791	634.717	85.724	12.019	182.128	36.7494	1687.13	622.501	2.71024
54	794.595	609.764	132.566	21.8216	76.4302	29.4254	1664.6	349.375	4.76452
55	442.852	670.033	115.082	9.2397	40.4757	27.3003	1304.98	173.624	7.51612
56	795.137	934.506	182.005	30.7543	117.7	41.5927	2101.7	458.87	4.58015
57	866.389	369.969	77.6744	10.0893	60.6585	21.2661	1406.05	406.453	3.45931
58	483.538	614.495	122.667	10.9698	72.5643	30.2501	1334.48	523.787	2.54776
59	660.165	399.626	132.33	19.0041	98.2286	37.822	1347.18	741.042	1.81795
60	1026.96	1100.5	187.567	19.8848	68.2164	38.636	2441.77	181.371	13.4628
61	492.773	483.404	66.0153	13.5519	79.6965	27.1398	1162.58	328.709	3.53681
62	277.477	448.321	91.4656	15.0615	31.7824	15.8831	879.99	211.927	4.15233
63	284.132	378.709	90.8348	8.18082	40.4614	15.7878	818.106	317.446	2.57715
64	735.059	925.042	156.241	23.3868	50.093	38.3946	1928.22	387.61	4.97463
65	824.918	1333.67	259.448	16.2362	63.409	127.144	2624.82	537.836	4.88034
66	378.641	964.228	146.118	17.6457	39.2688	29.6799	1575.58	437.904	3.59801
67	376.947	576.252	140.612	15.9184	34.0165	30.4672	1174.21	405.714	2.89419
68	817.262	356.664	56.0586	7.377	84.7942	23.5356	1345.69	544.474	2.47154
69	761.264	2047.84	90.875	17.3667	125.194	42.407	3084.94	237.367	12.9965
70	575.864	465.269	155.261	22.3372	66.5207	44.1399	1329.39	662.159	2.00766
71	904.451	527.129	66.9385	8.2545	89.283	25.6327	1621.69	550.634	2.94513
72	1219.88	1444.2	85.1601	20.4801	181.263	230.633	3181.62	402.846	7.89787
73	1486.22	1481.9	71.495	11.5463	179.948	39.5803	3270.69	326.962	10.0033
74	741.091	456.274	139.816	20.1622	92.6869	37.0261	1487.06	874.583	1.7003
75	717.807	1222.09	185.094	25.6601	50.2188	39.5569	2240.43	316.952	7.06866
76	941.729	816.682	45.4649	8.91545	82.3945	19.9379	1915.12	598.759	3.19849
77	481.114	298.658	48.0089	8.72401	62.0267	16.4746	915.006	351.326	2.60444
78	1089.21	605.485	47.4899	9.42189	102.615	22.7625	1876.98	721.142	2.60279
79	528.625	194.396	71.2709	16.3763	67.798	24.4652	902.931	587.236	1.5376
80	421.727	224.394	48.0998	7.74981	76.8183	19.0579	797.847	449.684	1.77424
81	555.94	317.348	56.6273	13.5072	93.3578	22.0266	1058.81	590.431	1.79328
82	803.459	838.507	282.399	33.416	67.8213	62.3452	2087.95	300.235	6.95437
83	520.972	611.166	138.068	18.4039	49.333	34.1589	1372.1	472.897	2.90148
84	549.619	754.242	169.659	22.0561	79.6731	44.0001	1619.25	389.521	4.15703
85	671.772	913.432	144.153	25.6378	58.6545	39.4178	1853.07	337.831	5.4852
86	907.964	296.154	230.861	20.6641	55.4791	32.6235	1543.75	286.361	5.39091
87	490.099	627.926	60.2551	16.8877	67.137	18.7261	1281.03	362.112	3.53766
88	769.881	326.764	69.6085	10.5712	135.561	27.2495	1339.63	561.987	2.38375
89	383.463	357.322	88.7341	15.38	39.3692	17.359	901.628	298.436	3.02117
90	681.846	863.32	137.994	18.5579	67.7117	35.844	1805.27	247.927	7.28149
91	702.642	956.762	195.62	46.2815	68.8064	38.7623	2008.88	350.291	5.73488
92	472.526	510.104	117.14	17.0959	56.4448	26.5966	1199.91	530.636	2.26126
93	272.32	571.168	136.632	18.0704	32.1728	16.8088	1047.17	162.107	6.45976
94	842.568	744.368	136.111	27.2029	56.2057	39.8609	1846.32	238.435	7.74349
95	723.867	414.155	123.656	10.6918	72.069	35.6323	1380.07	571.429	2.41512
96	1607.06	487.294	168.328	33.4242	171.236	79.7141	2547.06	562.158	4.53085
97	452.778	167.476	97.5145	17.1445	56.4727	23.9684	815.354	434.921	1.87472
98	1383.81	203.137	293.099	30.1231	118.81	80.3281	2109.31	233.144	9.04724
99	1053.07	549.667	143.994	24.1962	75.5696	54.7851	1901.29	236.755	8.0306
100	359.114	750.581	122.288	8.24264	31.583	17.9682	1289.78	328.544	3.92573
101	553.707	391.483	241.308	25.6256	57.4104	29.2853	1298.82	527.03	2.46441
102	1118.16	1119.44	121.776	19.0242	80.4757	43.1717	2502.05	323.13	7.74317
103	481.925	650.51	134.61	16.9365	39.9572	27.4353	1351.37	115.457	11.7046
104	326.648	480.569	119.985	15.7986	32.4986	18.461	993.961	312.852	3.17709
105	768.586	678.58	110.896	18.0326	49.6478	26.7055	1652.45	175.845	9.3972
106	1110.82	2439.23	101.499	12.3379	147.272	47.7278	3858.89	274.652	14.0501
107	2147.83	869.979	91.7836	20.2168	282.601	76.8064	3489.22	556.225	6.27304
108	1377.53	1958.69	86.2447	12.0156	168.845	38.613	3641.94	313.094	11.6321
109	896.413	419.605	105.158	20.1453	60.6504	34.9248	1536.9	186.312	8.24904
110	622.128	760.239	119.602	26.5613	78.5482	38.0906	1645.17	230.572	7.13516
111	362.229	391.42	100.448	9.72184	36.4041	19.3204	919.544	352.585	2.60801
112	578.523	282.17	55.3291	9.98139	88.0493	21.3847	1035.44	410.112	2.52477
113	448.532	307.749	95.326	16.9802	44.7374	21.436	934.761	433.245	2.15758
114	895.065	759.245	161.472	21.0319	53.5922	30.3015	1920.71	358.175	5.36248
115	972.598	780.724	126.566	10.1128	70.0143	39.6504	1999.67	492.667	4.05886
116	2358.87	511.924	132.808	11.8435	201.088	45.5925	3262.13	113.13	28.8351
117	4059.22	1010.96	207.671	30.4967	324.543	97.376	5730.27	295.746	19.3756
118	485.917	328.494	95.6088	24.4868	38.7938	25.2095	998.51	262.783	3.79975
119	4540.06	865.873	585.57	76.6098	119.812	102.647	6290.57	60.8	103.463
120	672.891	584.967	80.7077	18.6882	103.788	22.3087	1483.35	56.8087	26.1113
121	4376.37	961.705	557.531	64.3533	141.576	110.701	6212.23	81.8485	75.8992
122	547.108	1084.98	151.127	20.7905	36.9944	35.231	1876.23	248.062	7.56357
123	560.696	496.891	73.2794	10.6324	97.1801	23.5163	1262.2	504.665	2.50105
124	497.205	588.335	62.8953	9.63094	75.4876	19.7721	1253.33	346.363	3.61854
125	405.337	896.247	88.4961	15.997	87.8036	20.4115	1514.29	56.8558	26.6339
126	2224.63	766.768	122.987	10.3778	180.716	58.5972	3364.07	177.799	18.9206
127	533.103	844.809	142.574	26.0177	29.5964	26.2366	1602.34	56.5921	28.3138
128	476.486	530.566	133.206	21.1273	27.737	18.2198	1207.34	180.977	6.67125
129	546.859	686.188	87.5588	23.2498	93.9507	21.2482	1459.05	67.5466	21.6007
130	514.686	654.293	90.2203	9.77098	74.3406	19.4216	1362.73	366.751	3.71569
131	1562.03	496.249	288.777	26.761	48.0439	41.9524	2463.82	149.323	16.4999
132	2748.49	891.301	143.116	11.2614	223.109	47.5165	4064.8	191.236	21.2554
133	762.829	625.215	111.56	23.4444	53.1875	29.8362	1606.07	133.113	12.0655
134	797.216	394.263	94.0463	10.4222	149.579	32.1726	1477.7	97.7401	15.1187
135	1502.4	2376.81	228.647	42.2771	69.6979	56.3868	4276.21	130.515	32.7642
136	728.315	445.838	129.01	20.488	31.2867	20.812	1375.75	205.909	6.68134
137	824.106	266.497	75.4972	8.32882	122.921	27.5624	1324.91	111.661	11.8655
138	699.824	416.153	72.8784	10.5336	116.073	25.9683	1341.43	82.934	16.1747
139	570.67	672.277	161.896	24.5892	32.9842	30.4163	1492.83	139.657	10.6892
140	1139.04	1698.85	270.448	28.5052	53.1694	38.8434	3228.86	57.5198	56.1347
141	684.295	854.668	111.367	15.3894	42.7156	21.5659	1730	180.453	9.587
142	1260.94	197.977	223.81	21.9568	48.8439	36.365	1789.89	158.649	11.2821
143	505.062	301.863	54.008	9.66575	71.4774	18.6672	960.743	361.956	2.65431
144	1254.77	229.443	255.803	23.2643	51.3754	38.9658	1853.62	184.948	10.0224
145	1326.9	1140.41	232.459	14.7052	80.876	61.4968	2856.85	172.995	16.5141
146	1523.61	1519.94	376.649	29.0138	106.524	75.6714	3631.41	213.446	17.0132
147	388.752	641.237	117.335	8.60976	22.9366	20.3687	1199.24	46.8601	25.5919
148	3692.14	353.337	109.76	24.0752	340.119	108.607	4628.04	0	#DIV/0!
149	2254.51	425.315	179.512	38.6555	182.47	70.3202	3150.79	0	#DIV/0!
150	749.464	431.421	59.1346	9.44664	67.1074	14.6118	1331.19	6.85572	194.172
151	1844.98	100.097	290.211	161.054	128.248	52.5676	2577.15	0	#DIV/0!
152	2790.92	600.23	573.839	158.602	125.331	85.7917	4334.71	0	#DIV/0!
153	1216.83	1286.16	177.237	57.2443	263.095	82.3874	3082.95	0	#DIV/0!
154	1597.25	282.603	241.77	102.477	275.949	70.5825	2570.63	0	#DIV/0!
155	2551.96	816.632	374.34	126.545	288.732	80.5595	4238.77	0	#DIV/0!
156	2572.8	614.915	373.219	142.681	307.793	84.7914	4096.2	0	#DIV/0!
157	655.145	1134.24	299.83	107.365	64.7926	40.8808	2302.25	0	#DIV/0!
158	1302.63	341.698	408.94	112.662	96.1021	66.0033	2328.04	6.40218	363.633
159	1690.77	597.595	485.662	110.086	68.0416	51.018	3003.17	0	#DIV/0!
160	1600.82	242.159	104.617	24.9454	114.542	43.9469	2131.03	0	#DIV/0!
161	2164.27	465.849	427.62	119.48	88.616	64.1516	3329.98	0	#DIV/0!
162	3139.24	159.158	283.086	108.258	745.917	199.565	4635.22	0	#DIV/0!
163	2051.18	385.097	165.174	26.0188	164.324	64.235	2856.03	0	#DIV/0!
164	1975.75	558.007	429.839	86.5667	80.0567	56.5556	3186.78	0	#DIV/0!
165	5257.02	629.061	418.479	131.013	543.708	170.07	7149.35	0	#DIV/0!
166	2602.62	793.696	209.997	24.0403	285.664	52.209	3968.23	0	#DIV/0!
167	2215.14	523.475	155.739	23.33	246.132	45.1825	3208.99	31.8484	100.758
168	3420.78	1149.62	948.694	48.155	87.6549	112.015	5766.92	32.0521	179.923
169	2625.01	619.868	577.649	165.521	120.197	90.7939	4199.04	0	#DIV/0!
170	809.838	337.867	139.458	33.1301	61.0931	37.0656	1418.45	0	#DIV/0!
171	616.35	560.933	141.849	30.5239	37.683	29.889	1417.23	6.60698	214.504
172	4120.81	685.466	235.6	42.4025	307.909	97.5155	5489.7	0	#DIV/0!
173	727.565	871.43	164.052	28.4424	29.1464	13.6715	1834.31	31.9252	57.4565
174	1350.72	745.448	149.333	41.6535	212.274	50.2215	2549.65	6.49479	392.568
175	1102.36	490	254.798	54.0922	78.8759	48.9623	2029.09	33.1766	61.1602
176	1123.76	1970.63	137.058	31.8675	75.6988	39.82	3378.84	0	#DIV/0!
177	708.02	890.002	272.101	70.2154	62.0716	35.0974	2037.51	0	#DIV/0!
178	483.917	522.307	186.35	114.667	38.8646	25.8747	1371.98	0	#DIV/0!
179	779.221	651.483	71.7953	9.65958	110.3	23.1039	1645.56	35.3648	46.5311
180	1194.26	254.349	429.272	126.548	88.0053	64.1936	2156.63	0	#DIV/0!
181	915.298	762.862	200.51	63.8515	93.1404	39.5454	2075.21	0	#DIV/0!
182	767.984	491.049	121.896	65.3348	82.0966	27.2417	1555.6	6.94297	224.054
183	1192.2	209.49	100.436	25.7192	174.404	58.0908	1760.34	0	#DIV/0!
184	499.73	448.108	181.185	123.634	38.5168	24.0814	1315.26	0	#DIV/0!
185	443.65	952.892	227.037	22.9085	37.4767	30.3791	1714.34	37.2794	45.9864
186	700.216	946.709	170.519	10.6699	38.7686	42.2715	1909.15	15.828	120.619
187	496.118	831.116	135.481	28.7929	138.97	36.6964	1667.17	0	#DIV/0!
188	480.127	631	208.067	53.8136	47.5818	25.268	1445.86	0	#DIV/0!
189	584.007	375.328	151.451	43.9984	64.0247	28.749	1247.56	0	#DIV/0!
190	1175.63	320.154	264.995	11.9703	65.4405	50.4206	1888.61	0	#DIV/0!
191	481.028	691.493	165.493	38.4615	37.3231	30.3932	1444.19	0	#DIV/0!
192	562.063	392.99	120.279	29.2551	46.789	29.2228	1180.6	0	#DIV/0!
193	1476.41	1105.68	100.907	11.9362	112.055	36.8635	2843.85	24.6619	115.314
194	906.582	1115.94	182.403	24.3147	45.8239	35.8559	2310.92	26.8309	86.1291
195	881.055	1228.25	188.984	21.6018	46.4256	38.4568	2404.77	56.5118	42.5534
196	593.748	669.446	176.472	57.5916	64.1037	34.2382	1595.6	0	#DIV/0!
197	577.491	1204.13	262.493	91.8286	54.4931	33.8055	2224.24	40.8369	54.4665
198	877.241	731.383	184.986	25.7092	33.578	29.4782	1882.38	26.2985	71.5774
199	702.292	820.499	175.931	37.4729	38.3416	36.892	1811.43	6.29035	287.97
200	874.483	1034.8	199.066	24.2636	53.8946	31.6853	2218.19	24.4681	90.6564
201	717.717	429.344	127.556	34.9082	53.6545	29.9924	1393.17	0	#DIV/0!
202	1059.69	778.926	188.807	52.428	214.96	53.8413	2348.65	0	#DIV/0!
203	847.866	937.763	245.166	45.0939	77.9998	42.6567	2196.55	18.0623	121.609
204	1293.24	1333.27	160.549	41.8396	108.74	53.7925	2991.43	6.47934	461.687
205	692.058	454.765	116.295	65.6735	86.8854	29.0475	1444.72	0	#DIV/0!
206	950.224	565.338	280.345	53.7731	34.9888	37.2818	1921.95	0	#DIV/0!
207	679.772	480.746	182.793	62.5978	44.981	30.3714	1481.26	0	#DIV/0!

## Sheet: Total (2)
	peak 1	peak 2	peak 3	peak 4	peak 5	peak 6	peak 7	peak 8	peak 9	peak 10	peak 11	peak 12	peak 13	peak 14	peak 15	peak 16	peak 17	peak 18	peak 19	peak 20	peak 21	peak 22	peak 23
1	64.35	24.09	65.49	37.34	250.86	56.42	13.43	24.65	8.6	9.14	134.56	568.98	26.48	0	18.25	246.39	84.51	9.11	936.89	12.86	145.14	23.45	0
2	91.66	34.21	40.15	22.61	161.21	125.07	27.1	36.2	8.03	7.5	113.19	590.23	26.44	0	15.36	94.69	30.06	0	522.68	12.84	70.66	9.57	0
3	99.16	45.48	77.93	76.74	409.42	59.84	19.39	16.45	7.32	9.56	77.24	420.25	29.68	7.06	13.25	41.9	52.08	9.09	395.06	10.77	105.52	12.52	7.92
4	138.1	50.73	100.24	62.32	395	67.08	22.07	32.3	9.31	9.38	86.66	620.12	29.4	0	14.29	52.26	58.2	7.48	510.13	10.33	92.9	10.7	6.85
5	113.43	41.38	113	92.46	514.45	84.08	15.92	24.26	7.59	10.59	173.1	862.37	35.63	0	19.13	229.22	77.41	8.53	963.44	14.33	152.88	14.22	7.23
6	76.43	35.3	69.95	63.81	397.77	86.94	13.69	19.03	8.29	7.83	82.62	577.28	31.48	0	17.69	113.95	82.98	8.26	840.68	11.14	128.7	11.44	8.23
7	85.76	72.58	75.86	104.17	316.92	96.54	15.51	25.21	9.93	6.53	38.93	775.58	44.3	10.07	11.93	45.99	70.91	9.65	1389.35	12.46	246.79	25.6	25.58
8	103.89	46.81	105.32	79.97	392.48	80.62	27.82	34.07	8.05	8.72	101.12	809.39	45.32	8.08	14.12	66.71	42.9	7.51	640.17	15.77	173.13	17.7	9.78
9	121.3	60.05	101.06	91.77	474.68	103.87	26.59	20.33	7.19	11.46	138.97	761.39	39.56	0	14.35	49.77	51.62	8.73	463.89	11.83	124.6	13.03	8.18
10	75.75	34.96	72.93	48.54	330.01	81.77	20.57	36.82	8.46	10.33	104.79	728.22	34.56	0	13.67	40.77	44.57	7.42	373.12	12.58	90.6	10.18	7.28
11	63.84	37.53	52.74	50.32	215.89	39.81	15.26	16.65	8.3	10.03	69.99	306.06	20.68	0	15.89	108.65	66.02	11.34	481.64	9.65	103.66	15.4	8.02
12	83.6	32.2	39.69	18.1	86.42	62.64	19.15	42.27	11.1	7.86	97.87	494.28	16.81	0	13.13	133.28	38.18	0	580.34	7.21	30.15	10.03	0
13	129.76	54.89	126.69	73.91	450.53	66.58	15.41	38.07	9.57	11.81	109.68	428.57	33.97	0	16.59	84.35	83.69	9.71	471.33	12.31	129.89	13.83	12.12
14	57.48	36.43	63.22	80.58	325.32	77.43	19.42	31.03	7.95	9.08	53.3	637.89	40.13	11.84	10.86	19.31	70.49	0	984.98	12.46	172.71	22.97	14.58
15	158.47	52.89	135.8	57.02	380.85	94.77	16.26	36.98	7.75	8.82	110.82	515.27	36.24	0	14.3	48.94	53.9	8.07	337.25	12.26	110.11	9.18	0
16	52.84	22.97	63.78	44.88	295.39	51.43	8.99	40.07	7.95	10.45	62.14	598.7	32.24	0	10.41	22.83	88.6	0	942.01	12.44	157.43	16.76	0
17	63.47	22.23	29.12	16.86	115.1	84.24	12.26	29.76	7.69	0	97.33	476.41	20.35	0	13.25	77.59	28.04	0	438.09	9.73	58.03	9.15	0
18	104.29	25.04	91.53	38.34	295.53	53.8	12.26	25.21	9.02	8.17	78.93	442.33	28.5	7.66	13.89	154.81	63.04	7.73	783.42	11.52	120.55	16.45	7.85
19	87.97	39.96	39.06	19.29	132.76	56.23	16.12	19.64	8.06	10.78	94.78	377.27	15.12	0	17.41	60.8	76.48	8.07	382.09	9.17	36.07	10.06	0
20	70.84	24.1	52	31.08	178.17	75.76	22.63	31.02	10.72	14.64	174.23	357.31	30.9	8.18	23.9	197.48	131.63	13.6	584.74	13.04	112.38	22.54	9.56
21	54.38	32.41	68.09	56.71	270.5	48.17	17.53	24.46	6.86	23.65	165.17	472.38	29.43	0	14.29	20.33	29.49	33.67	286.24	11.78	162.77	23.76	11.72
22	243.37	159.58	94.95	50.68	172.96	143.81	30.68	52.67	14	13.32	263	1313.99	41.63	9.22	25.81	520.27	84.1	11.01	2065.96	11.78	81.36	20.45	7.34
23	173.03	57.92	77.3	29.03	205.14	109.52	15.97	18.12	10.56	7.4	71.24	349.2	27.68	0	24.13	82.9	81.43	8.31	505.42	12.96	64.44	13.37	0
24	131.98	62.06	104.1	62.91	422.45	38.78	11.9	26.54	7.72	10.75	33.37	215.35	23.17	0	9.77	27.64	41.51	7.71	182.79	8.54	68.33	10.77	7.49
25	91.8	41.94	44.19	22.26	99.11	64.88	21.37	42.9	11.14	8.52	115.22	562.9	18.15	0	14.65	143.72	48.11	0	732.36	9.38	36.26	11.25	8.11
26	386.38	111.26	148.34	46.44	269.42	149.99	32.26	44.6	8.17	11.19	205.17	855.63	34.16	0	17.98	77.61	46.41	7.05	434.34	10.66	50.55	9.64	0
27	423.32	138.31	173.18	58.08	340.72	157.93	31.7	35.58	7.79	11.72	205.39	818.45	37.65	0	19.65	70.76	51.32	7.52	416.83	11.27	57.75	9.36	0
28	65.39	35.58	76.42	59.71	346.54	30.25	11.34	14.48	7.96	8.62	58.52	277.11	22.54	0	16.43	124.03	87.31	8.72	585.62	8.64	114.86	11.91	0
29	186.61	96.98	126.76	89.22	419.91	69.37	16.67	21.34	9.17	9.77	74.45	386.65	31.48	10.63	15.2	60.25	55.16	7.34	382.34	10.35	78.6	13.22	18.9
30	64.92	31.72	41.91	31.36	138.37	58.42	15.21	39.89	7.47	8.25	125.26	597.01	18.68	0	13.08	173.91	42.54	0	914.21	9.83	59.42	12.79	7.98
31	40.46	32.27	33.36	43.31	120.03	83.81	14.56	20.75	10.45	0	33.05	838.68	34.13	9.88	9.63	55.2	52.67	9.87	1210.33	14.33	200.89	28.5	26.44
32	59.03	31.91	47.45	50.58	250.94	52.11	12.2	22.5	7.33	9.02	17.71	336.37	18.56	7.47	0	9.18	24.92	0	181.25	6.3	54.2	13.59	10.42
33	38.37	44.47	30.44	43.63	99.83	107.41	25.51	38.17	9.08	27.58	330.19	1699.59	63.9	0	24.26	32.81	70.08	21.92	300.7	16.09	302	28.63	14.03
34	111.59	50.39	85.97	54.15	296.41	91.11	22.72	37.03	8.74	10.18	86.04	528.3	31.42	0	12.85	27.09	48.27	7.72	277.88	11.18	85.3	10.53	6.87
35	98.14	41.4	86.23	53.02	353.61	89.65	23.05	41.62	8.6	10.99	115.3	805	47.8	0	15.05	40.27	44.81	7.4	355.82	12.65	90.47	10.38	7.12
36	104.52	47.19	111.6	87.71	470.13	80.16	25.03	41.99	7.69	6.86	35.64	743.88	50.19	8.46	9.44	15.05	40.87	0	520.2	12.41	170.6	16.72	11.5
37	40.4	37.03	46.2	65.89	170.73	60.75	17.46	25.79	7.41	18.32	123.08	802.11	27.58	9.14	17.36	37.77	54.13	23.57	200.57	10.56	182.05	29.54	10.83
38	190.84	58.19	125.08	57.49	395.34	89.44	21.81	35.88	8.3	8.82	86.75	631.13	31.34	0	13.23	33.83	43.06	7.1	307.57	9.27	73.9	10.22	7.22
39	140.74	51.71	65.97	34.01	301.84	96.15	27.7	30.35	7.73	10.16	112.17	442.21	22.35	0	12.87	41.64	40.88	0	223.48	10.84	48.48	9.16	0
40	45.65	23.28	41.7	46.03	280.46	57.34	16.48	17.41	7.45	0	48.86	325.14	22.92	0	10.94	64.99	43.26	7.26	402.56	9.89	101.74	10.55	8.28
41	87.59	63.05	79.37	96.63	349.62	105.25	17.38	22.78	8.62	7.48	45.32	885.2	53.87	12.16	9.16	36.17	97.76	7.86	1558.07	15.81	251.62	23.78	28.11
42	34.11	13.52	27.33	23.36	112.81	67.26	14.36	17.85	8.02	8.61	88.33	425	21.79	8.82	16.86	205.87	34.91	8.47	870.64	12.35	87.58	19.14	15.58
43	27.41	18.21	25.54	32.36	115.92	30.85	10.92	11.56	8.45	7.5	37.56	235.15	17.78	7.49	20.25	185.59	64.36	9.62	1152.8	10.21	105.58	24.23	16.57
44	120.62	37.69	50.08	22.53	194.37	116.85	16.14	31.72	9.2	8.5	159.99	654.97	24.01	0	15.85	89.1	45.85	0	484.38	10.71	61.99	9.59	0
45	40.09	34.48	30.96	42.28	129.5	128.76	25.44	55.5	7.32	48.56	348.56	1642.15	55.6	15.47	20.3	26.06	52.72	40.93	444.01	15.68	229.68	30.86	19.22
46	43.81	20.37	40.34	29.61	158.41	28.76	9.5	9.9	7.54	7.75	41.65	224.16	17.02	0	12.82	76.28	58.69	8.58	511.41	8.79	82.86	17.67	9.98
47	40.43	27.11	50.49	67.82	307.08	85.09	10.49	25.63	8.59	0	33.08	891.05	36.4	11.42	7.51	28.45	82.88	0	1637.75	13.32	241.66	35.41	30.74
48	127.83	53.2	104.56	69.28	463.12	95.29	14.09	33.02	7.21	0	46.46	714.63	39.94	0	11.29	14.11	54.87	0	529.06	13.16	143.36	11.78	7.72
49	92.4	39.2	75.4	53.08	341.47	47.06	12.6	30	7.65	10.65	51.39	325.24	23.4	0	11.55	31.21	44.27	7.35	207.6	9.86	62.71	10.1	6.78
50	65.64	18.76	43.58	14.05	61.44	61.44	18.43	34.93	7.52	11.59	169.8	821.71	22.94	0	16.18	116.23	54.84	7.85	565.31	9.24	58.96	12.41	0
51	64.85	26.26	47.18	25.72	147.26	68.87	17.23	15.22	6.92	7.74	78.49	385.22	20.14	0	8.95	46.43	21.68	6.65	201.11	8.63	51.12	10.08	7.16
52	54.06	20.07	36.93	26.57	128.35	76.36	19.97	23.21	7.69	8.96	82.81	434.77	21.87	8.55	9.59	70.27	20.46	7.81	277.84	11.02	59.73	13.26	10.61
53	194.73	89.1	73.93	37.1	227.65	182.13	21.31	42.14	10.06	8.36	88.93	564.98	36.75	0	15.87	52.74	51.37	0	514.73	12.02	76.9	8.83	0
54	62.93	28.84	47.86	33.57	176.18	76.43	23.39	31.69	7.64	9.72	90.77	631.39	29.43	0	13.47	51.78	45.78	7.84	498.74	11	110.88	13.85	10.82
55	19.35	10.07	22.73	19.15	102.33	40.48	11.22	14.38	7.11	7.71	48.54	353.9	19.32	7.98	13.37	57.93	59.62	8.41	539.12	9.24	90.43	16.25	0
56	85	47.71	67.15	48.81	210.21	117.7	18.7	38.7	7.78	0	36.61	693.34	41.59	0	9.58	20.07	49.8	0	855.05	12.25	165.39	16.61	18.5
57	67.6	30.56	55.3	37.55	215.44	60.66	18.22	36.66	6.69	0	29.67	775.15	21.27	0	8.76	10.22	31.19	0	319.8	10.09	67	10.68	0
58	83.87	36.11	70.07	46.38	287.37	72.56	19.04	39.82	13.5	8.53	50.03	352.62	30.25	0	14.23	50.33	70.61	7.52	479.32	10.97	105.31	9.83	0
59	129.47	44.29	102.18	61.06	404.03	98.23	18.91	23.37	7.94	8.63	82.76	518.56	37.82	0	12.25	41.19	36.45	7.26	309.74	10.59	113.14	11.93	8.42
60	23.07	15.31	20.63	23.77	98.59	68.22	18.53	21.91	7.83	8.06	124.68	845.95	29.77	8.86	12.48	153.07	32.63	7.48	902.31	10.8	163.05	17.04	9.08
61	76.04	50.27	32.99	26.7	142.71	79.7	15.31	19.64	8.47	8.12	57.52	383.71	20.09	7.05	13.58	59.73	43.59	7.59	366.51	7.17	49.37	9.05	6.39
62	27.32	15.37	22.34	23.47	123.42	31.78	12.56	14.38	8.59	7.35	33.4	201.2	15.88	0	9.53	57.89	32.3	6.97	348.61	8.66	74.73	9.76	6.4
63	37.81	22.17	32.62	37.52	187.32	40.46	11.3	12.46	7.06	8.32	43.34	201.66	15.79	0	11.42	46.76	46.94	8.25	273.59	8.18	73.07	9.52	0
64	41.17	22.77	47.37	50.91	225.39	50.09	14.64	39.03	9.93	8.22	37.5	625.74	30.12	8.28	9.4	24.41	83	0	808.24	13.63	139.23	17.02	9.75
65	55.24	33.08	63.54	76.42	309.56	63.41	20.87	34.03	7.29	10.79	98.94	652.99	44.7	82.45	13.72	140.22	57.72	8.53	1122.01	0	232.29	18.62	16.24
66	58.95	28.06	50.91	50.5	249.48	39.27	13.71	12.21	7.53	8.01	50.3	286.89	22.77	6.91	13.31	92.56	71.14	9.06	787.21	9.49	116.27	20.78	8.16
67	44.58	22.35	49.16	46.48	243.14	34.02	14.09	16.34	8.36	7.91	36.56	293.68	23.47	6.99	11.69	50.75	62.7	8.29	451.11	9.06	116.5	15.82	6.86
68	157.67	39.77	85.1	37.22	224.71	84.79	21.06	71.31	7.55	11.58	128.04	577.71	23.54	0	12.64	41.44	35.76	6.96	266.82	7.38	40.74	8.36	0
69	81.83	28.4	37.35	15.07	74.72	125.19	13.4	24.43	12.71	7.32	69.78	633.62	34.53	7.88	14.67	275.72	61.74	6.96	1695.71	10.32	71.88	12.03	7.04
70	90.41	32.09	98.31	60.63	380.73	66.52	16.89	18.39	7.71	6.81	60.97	465.1	36.66	7.48	12.95	50.02	60.5	8.3	341.79	11.08	129.19	17.77	11.26
71	147.09	42.99	84.04	40.73	235.79	89.28	21.74	72.85	8.03	11.59	142.58	647.66	25.63	0	14.64	57.79	50.86	7.05	403.83	8.25	50.98	8.9	0
72	153.5	48.49	62.71	20.93	117.21	181.26	18.51	31.82	10.33	0	110.76	1048.46	40.26	190.37	16.34	173.28	50.48	0	1204.11	10.84	73.28	11.88	9.64
73	120.97	42.72	51.51	18.56	93.21	179.95	21.03	33.84	10.73	7.88	147.12	1265.61	39.58	0	15.82	191.16	42.18	0	1232.74	11.55	61.88	9.61	0
74	123.49	57.41	102.96	88.34	502.37	92.69	24.2	19.91	7.16	11.1	105.44	573.28	37.03	0	13.13	38.01	47.4	8.98	357.74	11.6	118.02	12.82	8.56
75	28.12	17.35	35.95	41.3	194.23	50.22	15.24	35.93	9.58	8.37	35.32	613.37	31.14	8.42	9.05	31.09	84.52	0	1097.43	14.68	164.05	21.05	10.98
76	243.97	71.42	91.66	34.98	156.73	82.39	23.76	32.14	8.83	11.11	166.03	699.86	19.94	0	16.73	120.8	49.33	0	629.82	8.92	35.06	10.4	0
77	82.97	31.12	37.61	21.88	177.74	62.03	22.75	22.48	8.02	8.04	86	333.83	16.47	0	11.02	45.61	25.54	0	216.48	8.72	38.74	9.26	0
78	322.33	83.12	111.32	36.82	167.55	102.62	30.43	45.93	9.94	11.4	180.79	810.73	22.76	0	16.1	79.8	44.63	6.69	464.96	9.42	31.25	9.55	0
79	131.45	39.97	87.51	41.18	287.13	67.8	18.09	26.26	6.74	10.16	61.46	405.92	24.47	0	9.71	17.52	22.4	6.99	144.78	9.48	54.1	10.18	6.9
80	105.49	37.2	49.96	25.77	231.26	76.82	21.97	25.61	7.68	9.25	74.7	282.51	19.06	0	10.76	28.91	35.64	0	149.08	7.75	39.32	8.78	0
81	134.49	55.34	65.25	35.75	299.6	93.36	21.09	30.29	8.25	8.22	89.64	398.45	22.03	0	12.21	39.82	39.26	0	226.05	13.51	48.04	8.59	0
82	29.71	16.23	29.61	35.45	189.23	67.82	19.78	43.68	9.04	19.63	136.37	574.96	51.48	10.86	19.53	86.43	82.19	19.24	650.35	15.36	236.51	26.65	18.06
83	48.6	23.26	57.17	46	297.87	49.33	11.47	13.18	7.13	8.82	52.34	428.02	24.53	9.63	13.39	81.95	59.92	9.7	455.91	10	111.47	16.9	8.4
84	46.83	19.87	44.87	36.71	241.23	79.67	19.35	24.39	6.62	8.3	61.68	429.28	35.55	8.45	13.04	63.59	51.99	8.02	625.63	12.73	146.09	15.55	9.33
85	23.45	18.93	45.95	40.11	209.4	58.65	12.17	24.68	8.09	0	18.54	608.29	29.4	10.02	7.31	18.13	60.29	0	827.7	10.37	125.78	18.37	15.26
86	35	29.12	37.84	50.78	133.62	55.48	15.42	21.76	7.24	16.59	100.94	746.01	23.82	8.8	16.19	34.86	44.78	21.69	200.32	9.77	177.25	31.92	10.9
87	74.37	46.87	35.47	28.93	176.48	67.14	19.18	21.28	9.45	7.6	70.87	361.72	18.73	0	12.19	70.16	42.26	0	503.32	10.11	50.97	9.29	6.78
88	145.22	57.29	65.33	30.79	263.36	135.56	24.74	36.66	8.1	10.71	132.31	557.37	27.25	0	14.5	35.76	41.69	7	234.82	10.57	54.34	8.27	0
89	38.37	20.39	31.02	35.14	173.51	39.37	17.45	17.15	8.17	8.54	59.56	272.6	17.36	0	10.89	46.11	40.37	8.21	259.94	8.4	70.14	10.38	6.98
90	38.49	23.62	30.92	30.7	124.2	67.71	15.54	22.68	9.82	7.59	94.84	531.37	28.37	7.48	13.95	145.33	53.31	7.71	650.72	10.85	117.34	12.95	7.71
91	31.12	19.69	35.5	57.34	206.65	68.81	19.22	17.67	7.07	8.64	88.73	561.31	27.18	11.58	24.88	166.32	38.45	14.66	727.12	16.09	145.23	35.74	30.19
92	72.92	32.52	63.67	52.38	309.14	56.44	12.14	27.48	7.83	9.12	35.83	380.11	26.6	0	10.18	12.63	65.17	0	422.12	10.06	106.28	10.86	7.03
93	17.62	12.73	17.47	20.37	93.92	32.17	9.98	10.88	7.2	8.39	47.58	188.29	16.81	0	14.11	72.79	51.11	9.68	433.16	9.8	109.83	17.12	8.27
94	24.83	15.71	28.36	32.8	136.74	56.21	14.27	31.17	7.57	8.64	29.83	751.09	29.66	10.2	7.09	13.25	37.82	0	686.21	10.66	114.53	21.58	16.55
95	80.95	34.26	91.72	49.68	314.82	72.07	26.34	32.46	7.03	10.96	112.53	534.54	35.63	0	12.03	49.46	39.21	7.77	313.45	10.69	105.73	10.15	0
96	113.6	50.99	96.38	61.44	239.74	171.24	24.94	51.07	8.08	8.48	57.13	1457.37	63.81	15.9	12.99	25.3	37.75	7.14	411.26	18.04	142.54	18.65	15.39
97	53.91	31.31	46.13	52.76	250.82	56.47	21.16	20.82	7.46	10.15	71.08	322.11	23.97	0	9.25	21.07	29.25	8.37	107.9	9.5	78.43	10.72	7.65
98	33.41	31.51	27.13	35.31	105.78	118.81	28.14	59	6.95	30.96	239	1019.76	68.6	11.73	20.85	21.39	39.6	23.67	121.29	16.23	249.58	19.84	13.9
99	29.53	19.1	36.4	28.8	122.94	75.57	17.7	27.8	7.14	7.37	29.79	963.27	40.97	13.82	9.84	12.3	40.63	0	486.9	12.34	125.58	18.41	11.86
100	45.78	24.5	38.06	35.69	184.5	31.58	11.05	11.24	7.29	7.82	55.17	266.55	17.97	0	16.1	87.11	82	9.36	565.37	8.24	100.37	12.56	0
101	53.99	29.93	68.07	59.85	315.18	57.41	16.59	19.51	7.33	19.79	116.45	374.04	29.29	0	14.73	20.77	35.35	38.45	320.63	12.88	178.01	24.86	12.75
102	48.87	20.65	48.87	39.96	164.79	80.48	23.07	77.58	7.65	12.6	163.63	833.63	34.07	9.1	15.12	126.34	38.39	9.29	939.59	9.36	95.38	17.1	9.67
103	11.96	8.78	11.37	16.94	66.42	39.96	12.4	14.55	7.13	7.65	68.13	372.06	19.94	7.5	16.16	87.62	36.14	8.55	510.58	9.02	113.55	12.51	7.92
104	30.94	18.93	30.44	38.58	193.96	32.5	13.14	16.8	8.15	7.84	47.31	233.41	18.46	0	11.14	54.24	51.06	8.79	364.14	9.06	99.24	11.95	6.74
105	27.24	14.48	21.65	20.1	92.38	49.65	19.58	35.84	7.15	11.15	86.02	608.85	26.71	0	12.16	76.95	32	7.48	557.47	7.96	88.81	14.6	10.07
106	98.49	37.02	43.04	16.23	79.86	147.27	16.25	26.77	11.98	7.72	116.34	931.76	39.15	8.58	15.95	416.21	53.28	7.96	1953.79	12.34	77.85	15.68	0
107	217.65	74.55	87.66	28.02	148.35	282.6	27.97	42.04	8.74	10.09	194.19	1864.8	76.81	0	21.15	80.11	35.5	0	733.22	13.8	80.78	11	6.42
108	116.98	43.52	48.87	17.62	86.11	168.85	18.27	30.56	10.68	7.31	128.67	1182.04	38.61	0	16.7	249.59	47.34	0	1645.06	12.02	73.83	12.41	0
109	23.56	16.04	21.51	25.3	99.91	60.65	29.08	27.6	6.99	9.28	88.4	735.06	27.04	7.88	9.81	34.66	22.54	8.19	352.6	10.55	82.61	14.37	9.59
110	38.22	15.86	32.68	23.2	120.6	78.55	22.37	34.65	8.12	9.68	88.31	459	28.73	9.36	13.17	103.11	34.74	7.49	609.22	14.22	96.27	15.84	12.34
111	39.55	21.63	36.18	40.35	214.88	36.4	16.25	20.06	8.06	7.69	54.25	255.92	19.32	0	10.29	47.68	36.86	7.6	296.59	9.72	82.2	10.65	0
112	85.87	47.12	42.42	29.88	204.82	88.05	22.27	19.9	7.16	10.08	98.58	420.54	21.38	0	11.71	40.92	25.43	0	204.11	9.98	46.5	8.83	0
113	53.17	27.32	46.2	48.29	258.26	44.74	18.25	18.92	7.48	8.46	74.43	320.99	21.44	0	10.77	33.78	33.34	7.99	229.85	10.07	76.59	10.74	6.91
114	50.44	27.93	51.45	46.8	181.56	53.59	18.11	43.22	7.68	0	26.29	799.76	30.3	0	10.78	18.66	36.72	0	693.08	12.11	142.55	18.92	8.92
115	83.64	47.27	63.5	58.75	239.51	70.01	21.1	25.9	7.29	10.91	122.04	785.36	30.88	8.77	15.02	63.33	56.35	8.94	646.02	10.11	106.03	11.59	0
	88.9334	38.7281	61.126	44.0454	231.643	79.6233	18.5587	29.394	8.32296	9.5327	94.127	602.238	30.3413	5.94722	13.8261	79.0717	51.2769	7.28409	588.649	10.9726	107.313	14.9492	7.74339
	0.76779	0.6058	0.509495	0.456618	0.475657	0.498265	0.285904	0.431177	0.166057	0.621339	0.619881	0.51567	0.380302	3.26584	0.289029	0.977033	0.368232	0.984509	0.660668	0.222028	0.51576	0.415136	0.893448
116	36.43	21.76	17.09	10.36	27.48	201.09	17.28	34.85	9.07	14.5	255.97	2027.2	45.59	0	26.18	13.55	61.97	10.35	410.23	11.84	106.47	15.99	0
117	86.62	80.34	34.94	26.67	67.18	324.54	42.2	83.19	10.27	46.57	882.29	2994.71	77.1	20.28	39.77	228.5	59.38	20.51	683.32	20.56	164.11	23.05	9.94
118	27.38	16.37	25.34	36.87	156.81	38.79	10.14	28.34	7.67	9.63	18.32	411.83	16.71	8.5	0	10.32	27.5	7.19	290.67	8.83	68.19	20.22	15.66
119	7.32	10.16	8.7	15.07	19.55	119.81	10.91	67.29	10.57	11.67	146.45	4293.18	75.89	26.76	19.22	11.75	55.32	14.58	779.58	30.62	455.19	115.8	45.99
120	11.12	8.52	7.99	7.15	22.03	103.79	18.97	19.97	9.03	8.74	129.02	487.16	22.31	0	13.87	132.52	36.98	7.28	401.59	10.43	61.2	12.23	8.26
121	9.7	13.13	10.62	21.03	27.37	141.58	11.79	76.32	9.34	16.7	159.01	4103.21	84.19	26.51	16.99	13.91	64.26	17.33	866.54	19.38	439.74	100.46	44.97
122	18.66	13.1	24.25	38.32	153.73	36.99	10.93	29.23	8.48	9.88	31.12	457.47	26.83	8.4	0	20.42	56.62	0	1007.94	8.49	127.73	23.4	12.3
123	106.31	67.3	50.02	39.49	241.54	97.18	20.19	24.85	9.65	8.06	80.61	417.34	23.52	0	13.69	49.1	50.59	6.84	383.51	10.63	57.83	8.61	0
124	69.85	45.18	32.98	27.77	170.59	75.49	18.93	23.14	9.36	7.2	74.28	364.29	19.77	0	12.55	69.55	41.49	0	464.75	9.63	53.94	8.95	0
125	10.98	8.14	7.96	6.97	22.81	87.8	12.5	13.17	8.42	7.38	79.16	284.71	20.41	0	17.56	203.09	50.59	7.26	625	9.19	69.64	11.59	6.81
126	53.54	39.29	23.95	15.7	45.32	180.72	23.46	34.73	9.86	35.73	486.85	1633.99	58.6	0	36.52	89.82	99.61	17.07	540.82	10.38	94.63	11.28	0
127	7.95	7.2	8	11.23	22.21	29.6	17.83	22.66	7.51	9.42	70.86	404.82	18.88	7.35	14.83	95.16	33.57	9.3	701.25	9.85	112.23	21.05	16.17
128	16.95	12.59	18.93	29.82	102.69	27.74	14.57	26.33	7.81	8.03	68.93	350.82	18.22	0	12.04	87.14	28.58	12.13	402.8	8.94	97.44	23.63	12.19
129	13.19	9.3	8.91	7.35	28.79	93.95	15.58	17.99	8.36	8.14	105.02	391.77	21.25	0	15.11	140.21	46.21	7.11	484.66	9.34	67.49	12.96	13.91
130	67.26	53.36	32.91	35.08	178.13	74.34	19.91	18.56	8.65	7.48	85.43	374.65	19.42	0	13.91	102.4	43.28	7.31	494.7	9.77	73.32	9.6	0
131	11.85	15.28	15.2	37.79	69.2	48.04	16.72	13.09	6.41	29.77	255.12	1240.92	29.69	12.27	16.49	42.55	25.68	35.06	411.52	12.23	206.52	47.2	14.53
132	56.25	43.81	25.33	17.03	48.81	223.11	25	43.07	9.93	34.25	581.83	2054.4	47.52	0	39.01	103.06	101.87	16.64	647.36	11.26	113.71	12.77	0
133	14.79	11.9	13.54	22.34	70.55	53.19	21.19	16.13	7.23	8.72	89.53	620.03	21.58	8.25	13.54	80.34	24.9	9.9	506.44	9.58	84	17.66	13.86
134	19.23	11.43	11.97	9.07	46.03	149.58	26.8	29.5	7.67	10.37	133.05	589.83	32.17	0	13.7	63.52	46.18	7.29	270.86	10.42	77.77	8.98	0
135	15.76	16.6	16.67	29.16	52.32	69.7	19.57	15.08	11.17	27.19	210.03	1219.34	42.17	14.22	90.23	479.33	133.91	28.06	1673.33	16.71	164.16	36.42	25.56
136	20.34	15.08	26.42	28.51	115.56	31.29	20.41	34.57	7.18	10.28	81.23	574.65	20.81	0	10.26	46.33	29.68	8.6	359.57	10.46	100.47	19.94	10.03
137	19.82	11.72	12.69	10.2	57.23	122.92	26.55	31.14	6.76	10.79	144.39	604.46	27.56	0	12.04	37.06	28.57	6.82	188.83	8.33	60.18	8.5	0
138	15.3	9.8	10.27	8.24	39.33	116.07	24.13	26.91	7.76	9.02	123.28	508.72	25.97	0	12.8	60.78	38.18	0	304.4	10.53	64.44	8.44	0
139	10.74	9.22	13.08	25.42	81.2	32.98	14.31	20.73	8.65	6.16	13.73	507.1	21.93	8.49	6.6	14.92	61.85	7.86	588.91	8.87	130.83	23.2	15.72
140	7.49	7.54	7.58	11.86	23.05	53.17	30.52	32.79	9.14	12.51	243.05	811.02	30.25	8.59	24.17	296	61.26	15.49	1317.41	12.24	222.24	32.72	16.27
141	24.99	14.27	21.59	20.92	98.68	42.72	20.03	39.66	8.67	11.03	85.75	519.17	21.57	0	12.11	92.97	36.43	7.77	713.16	8.51	89.97	13.62	6.88
142	20.51	17.4	22.27	30.87	67.6	48.84	19.3	18.16	7.14	24.89	170.97	1020.47	27.93	8.43	11.6	26.49	22.63	22.89	137.25	12.14	163.39	37.53	9.82
143	68.23	44.33	34.67	30.07	184.65	71.48	20.24	19	6.86	8.53	88.53	361.9	18.67	0	11.21	44.85	25.5	0	220.31	9.67	45.36	8.65	0
144	22.19	21.32	24.55	38.67	78.21	51.38	19.69	22.52	7.5	23.6	166.61	1014.85	30.38	8.59	11.81	25.42	25.54	23.27	166.66	12.53	192.7	39.84	10.73
145	20.43	19.9	25.29	22.28	85.08	80.88	36	103.3	18.36	13.4	211.64	944.2	49.04	12.45	20.55	181.65	71.57	10.47	866.65	14.71	207.73	14.26	0
146	25.75	22.59	28.8	29.24	107.07	106.52	33.8	87.17	16.03	13.71	250.75	1122.14	61.7	13.97	25.97	231.79	92.55	13.02	1169.63	18.68	340.69	22.94	10.33
147	6.6	6.06	6.6	8.45	19.15	22.94	21.44	33.95	7.04	10.61	61.16	254.55	20.37	0	9.01	107.55	20.85	7.85	503.82	8.61	95.55	13.93	0
	28.8603	21.9997	19.6597	22.1562	79.0609	92.4444	20.6528	34.6059	8.98594	14.8112	174.499	1030.15	33.6875	6.03313	18.5419	100.064	50.0969	11.4141	580.733	11.98	137.777	24.5444	9.99781
	0.889572	0.845487	0.531782	0.494293	0.734708	0.721327	0.356049	0.668693	0.275864	0.674651	1.01714	1.00425	0.563949	1.30579	0.864313	1.00223	0.531869	0.710412	0.593153	0.392008	0.749459	0.988117	1.1624
148	0	0	0	0	0	340.12	21.13	105.22	10.55	60.13	460.11	3035	84.57	24.03	22.37	12.3	32.24	26.05	286.44	12.49	53.12	30.59	11.59
149	0	0	0	0	0	182.47	28.94	21.68	8.01	41.74	492.81	1661.32	51.75	18.57	23.92	57.96	38.62	28.68	304.81	20.86	128.76	22.07	17.79
150	0	0	0	0	6.86	67.11	15.64	35.83	6.96	8.85	155.64	526.55	14.61	0	12.83	85.89	24.61	7.19	308.08	9.45	42.07	9.87	0
151	0	0	0	0	0	128.25	21.74	27.61	8.08	89.32	295.35	1402.88	29.47	23.1	9.52	12.19	9.78	83.72	68.61	26.92	162.84	43.66	134.13
152	0	0	0	0	0	125.33	34.67	17.76	8.92	47.34	677.78	2004.44	56.85	28.94	28.41	98.71	28.8	103.79	444.32	32.91	305.17	164.88	125.7
153	0	0	0	0	0	263.1	21.53	12.84	14.34	18.14	77.15	1072.82	54.62	27.77	24.24	38.55	90.63	24.58	1132.73	12.65	126.96	25.7	44.59
154	0	0	0	0	0	275.95	39.47	48.05	14	53.58	263.57	1178.59	41.44	29.14	25.7	44.16	23.97	53.3	188.77	36.4	165.32	23.15	66.07
155	0	0	0	0	0	288.73	44.08	57.7	29.81	61.62	569.46	1789.3	48.69	31.87	47.76	205.3	41.68	55.29	521.89	46.96	273.02	46.03	79.58
156	0	0	0	0	0	307.79	29.97	62.79	19.95	65.73	519.91	1874.46	47.9	36.89	37.15	125.33	30.15	62.01	422.28	46.59	269.16	42.05	96.09
157	0	0	0	0	0	64.79	18.4	21.01	8.78	9.21	88.11	509.64	26.4	14.48	21.87	234.3	28.67	12.38	849.4	18.48	239.63	47.82	88.89
158	0	0	0	0	6.4	96.1	21.67	11.32	7.72	40.8	268.31	952.82	47.32	18.69	17.33	33.61	17.92	67.23	272.84	26.76	285.74	55.97	85.9
159	0	0	0	0	0	68.04	20.27	11.16	12.41	39.35	413.31	1194.27	34.09	16.93	35.69	147.69	21.84	48.96	392.38	26.75	343.48	93.22	83.33
160	0	0	0	0	0	114.54	24.5	20.81	7.23	32.43	323.39	1192.46	33.56	10.39	14.97	52.85	26.96	18.87	147.38	14.86	70.26	15.48	10.09
161	0	0	0	0	0	88.62	28.68	15.03	7.99	40.96	515.4	1556.21	41.36	22.79	24.34	79.58	20.99	87.81	340.94	27.56	214.13	125.68	91.92
162	0	0	0	0	0	745.92	23.07	26.31	20.82	15.29	267.59	2786.15	152.2	47.37	16.58	10.45	28.94	11.24	103.2	59.19	224.64	47.21	49.07
163	0	0	0	0	0	164.32	33.33	22.09	8.69	43.6	391.3	1552.16	49.08	15.16	20.95	47.43	32.92	28.7	283.8	12.18	116.36	20.11	13.84
164	0	0	0	0	0	80.06	24.9	13.54	10.24	34.3	418.27	1474.5	38.3	18.26	27.3	109.08	21.9	44.32	399.72	18.8	313.16	72.37	67.77
165	0	0	0	0	0	543.71	14.86	20.16	27.94	10.57	153.41	5030.07	106.88	63.19	13.76	6.35	24.87	12.01	584.09	16.76	294	112.47	114.26
166	0	0	0	0	0	285.66	27.96	90.52	9	24.3	451.34	1999.51	52.21	0	29.71	106.87	67.82	13.98	589.3	17.01	183.96	12.06	7.03
167	6.61	6.17	5.9	5.74	7.43	246.13	26.63	71.11	8.13	27.31	401.34	1680.61	45.18	0	25.85	54.66	60.61	13.65	382.36	16.63	130.87	11.22	6.7
168	0	6.8	6.21	9.13	9.92	87.65	42.15	227.3	11.49	59.64	529.51	2550.69	93.17	18.85	29.41	80.07	62.59	71.96	977.54	18.19	721.98	154.76	29.96
	0.314762	0.617619	0.576667	0.708095	1.45762	217.352	26.8376	44.7543	12.4314	39.2481	368.241	1763.07	54.7452	22.2105	24.2695	78.2538	35.0719	41.701	428.613	24.6857	222.125	56.0176	58.3
	4.58258	3.16244	3.15947	3.24777	2.15322	0.791126	0.304289	1.11302	0.537242	0.539513	0.444959	0.561873	0.56918	0.679793	0.369479	0.785449	0.558116	0.697463	0.641611	0.535001	0.655255	0.843797	0.735766
169	0	0	0	0	0	120.2	35.68	18.85	9.26	49.62	648.69	1862.92	61	29.79	31.65	98.64	33.07	117.67	456.51	42.7	320.15	139.84	122.82
170	0	0	0	0	0	61.09	23.6	26.68	0	10.42	137.48	611.67	27.42	9.64	9.71	79.72	20.36	12.29	228.07	12.81	105.9	21.27	20.32
171	0	0	0	0	6.61	37.68	29.77	21.8	8.02	8.26	68.95	479.55	20.46	9.43	15.52	79.5	28.23	11.23	437.68	10.74	104.44	26.18	19.78
172	0	0	0	0	0	307.91	35.63	76.99	10.13	52.92	854.08	3091.06	69.62	27.9	29.33	125.85	32.9	29.97	497.38	21.87	174.91	30.72	20.53
173	5.94	5.79	6.07	6.07	8.04	29.15	14.51	9.3	6.7	9.19	74.34	613.53	13.67	0	17.12	107.74	35.89	11.78	710.69	12.29	127.11	25.16	16.16
174	0	0	0	0	6.49	212.27	30.17	17.31	9.16	29.86	258.04	1006.19	34.39	15.83	31.01	164.61	29.57	20.58	520.26	20.75	112.49	16.26	20.9
175	6.52	5.85	6.01	6.26	8.54	78.88	26.59	11.48	7.01	13.91	279.7	763.67	34.95	14.01	13.02	120.42	16.75	19.76	339.8	20.7	199.61	35.42	33.4
176	0	0	0	0	0	75.7	22.75	18.29	10.7	19.97	366.49	685.56	27.88	11.94	32.69	863.02	36.78	22.11	1038.14	15.43	78.43	36.51	16.44
177	0	0	0	0	0	62.07	17.57	19.23	9.44	8.11	98.74	554.93	23.52	11.58	15.48	199	22.5	13.75	653.03	17.34	205.97	52.38	52.88
178	0	0	0	0	0	38.86	26.03	26.51	7.51	9.22	65.25	349.41	14.09	11.79	11.05	184.48	13.28	15.01	313.5	28.13	124.26	47.07	86.53
179	9.56	7.37	7.07	0	11.37	110.3	24.03	18.29	6.34	10.02	97.14	623.4	23.1	0	12.37	62.14	24.56	7.27	552.42	9.66	55.78	8.74	0
180	0	0	0	0	0	88.01	23.85	14.36	6.59	38.26	201.49	909.73	44.82	19.38	15.5	25.09	15.54	66.98	198.22	27.82	301.95	60.34	98.73
181	0	0	0	0	0	93.14	32.02	13.43	7.57	10.01	170.11	682.16	26.06	13.49	15.04	185.61	19.7	12.24	542.51	16.98	162.44	25.84	46.88
182	0	0	0	0	6.94	82.1	40.09	10.73	8.27	11.38	87.38	610.13	13.7	13.54	16.29	88.49	13.29	12.48	372.98	17.62	91.16	18.26	47.72
183	0	0	0	0	0	174.4	16.41	68.16	8.14	31.47	159.31	908.71	42.59	15.5	13.82	26.87	14.24	15.23	154.56	9.68	69.26	15.94	16.04
184	0	0	0	0	0	38.52	19.96	13.42	8.52	9.31	77.66	370.87	12.05	12.03	14.54	151.87	14.22	16.94	267.49	28.92	118.82	45.43	94.71
185	6	5.9	6.07	6.95	12.36	37.48	10.62	13.79	8.74	0	6.8	403.69	21.67	8.71	11.13	21.09	62.92	7.61	857.76	9.08	198.35	21.08	13.83
186	0	0	6.21	0	9.62	38.77	17.03	38.82	7.47	13.75	112.48	510.67	33.64	8.63	14.3	112.58	43.56	10.44	776.27	10.67	140.15	19.93	0
187	0	0	0	0	0	138.97	12.24	11.29	7.8	0	7.49	457.3	23.52	13.18	0	10.84	47.69	8.36	772.59	8.48	114.96	12.17	20.32
188	0	0	0	0	0	47.58	28.41	12.72	9.12	7.46	76.58	345.84	16.16	9.11	10.74	141.86	18.72	10.3	459.68	16.75	166.96	30.8	37.07
189	0	0	0	0	0	64.02	33.43	12.82	8	9.1	85.65	435.01	19.2	9.55	10.23	75.06	15.38	9.55	274.66	13.54	121.99	19.9	30.46
190	0	0	0	0	0	65.44	42.67	44.18	8.28	11.42	118	951.09	38.14	12.28	9.7	0	14.99	10.61	295.46	11.97	207.66	46.72	0
191	0	0	0	0	0	37.32	17.86	21.46	8.44	9.68	103.78	319.82	22.39	8	11.57	193.57	19.19	11.31	467.17	14.11	126.4	27.78	24.35
192	0	0	0	0	0	46.79	21.3	20.34	7.27	8.86	107.66	396.63	21.18	8.04	9.75	88.8	14.78	9.48	279.67	11.27	90.87	19.92	17.98
193	6.17	5.91	5.85	0	6.73	112.05	31.83	13.73	8.14	19.09	308.84	1094.78	28.05	8.81	18.76	184.59	24.9	11.2	877.44	11.94	75.94	13.77	0
194	6.02	0	6.58	5.99	8.24	45.82	18.29	29.78	8.6	12.73	181.78	655.4	26.9	8.95	17.42	207.58	46.92	12.53	844.02	12.97	143.48	26.39	11.34
195	7.36	7.43	7.63	10.71	23.38	46.43	28.13	34.93	7.57	15.16	199.24	596.02	29.92	8.53	23.51	242.44	59.68	14.79	902.63	10.13	154.08	20.11	11.47
196	0	0	0	0	0	64.1	25.9	13.87	7	10.58	118.24	418.17	21.67	12.57	17.03	179.15	20.65	11.97	452.61	16.05	141.44	23.06	41.54
197	7.19	6.33	7.2	6.81	13.3	54.49	17.25	15.14	8.75	7.26	65.3	463.78	21.14	12.66	17.6	210.49	25.61	11.35	950.43	16.17	204.76	46.39	75.65
198	0	0	6.36	7.29	12.65	33.58	19.38	16.55	6.79	9.31	73.69	751.52	20.13	9.34	12.9	61.85	29.72	10.31	626.91	12.03	148.67	26	13.68
199	0	0	0	0	6.29	38.34	20.25	30.78	7.27	10.27	125.57	508.15	26.6	10.29	13.45	163.14	26.8	11.06	617.11	13.84	128.17	36.7	23.63
200	6.68	0	6.59	0	11.2	53.89	21.42	34.36	7.35	11.06	111.79	688.5	31.69	0	14.99	92.78	52.71	7.88	874.31	15.47	173.14	18.05	8.79
201	0	0	0	0	0	53.65	20.75	40.51	6.93	10.67	110.61	528.23	20.89	9.11	11.13	75.85	15.39	8.78	326.97	11.11	97.17	21.61	23.8
202	0	0	0	0	0	214.96	25.88	15.74	8.65	27.25	175.4	806.77	35.94	17.9	30.28	142.13	36.83	23.88	569.68	25.62	148.31	16.61	26.81
203	6.35	0	0	0	11.72	78	18.99	10.72	6.29	9.27	135.83	666.76	31.84	10.82	11.77	148.89	24.69	11.03	752.42	17.1	201.76	32.38	27.99
204	0	0	0	0	6.48	108.74	29.7	26.19	9.79	24.07	379.82	823.67	38.87	14.92	31.67	442.88	36.22	24.51	822.5	17.08	110.84	25.19	24.76
205	0	0	0	0	0	86.89	36.5	10.3	7.9	11.02	83.15	543.18	14.93	14.12	15.88	94.96	12.06	11.86	331.88	16.61	88.38	16.06	49.07
206	0	0	0	0	0	34.99	34.83	66.52	9.23	12.78	115.21	711.66	28.1	9.18	12.64	79.32	18.2	12.43	455.18	12.51	220.72	47.19	41.26
207	0	0	0	0	0	44.98	21.48	33.33	7.45	10.33	92.87	514.31	20.72	9.65	12.13	88.16	14.66	10.93	365.79	14.23	140.63	31.24	48.37
	1.73821	1.14308	1.83692	1.2841	4.35795	80.9631	24.9436	24.4282	7.85103	14.95	167.708	710.627	27.7592	11.5436	16.2236	144.13	27.0038	17.3708	544.523	16.2095	146.09	30.8823	32.9746
	3.04559	2.49271	2.98335	2.85681	5.72746	59.1257	7.73075	16.3929	1.66358	11.5755	163.071	479.005	12.0273	5.80064	7.37461	142.66	13.3988	19.2532	239.358	6.84132	57.8143	21.6537	28.6574
	peak 1	peak 2	peak 3	peak 4	peak 5	peak 6	peak 7	peak 8	peak 9	peak 10	peak 11	peak 12	peak 13	peak 14	peak 15	peak 16	peak 17	peak 18	peak 19	peak 20	peak 21	peak 22	peak 23
1	88.9334	38.7281	61.126	44.0454	231.643	79.6233	18.5587	29.394	8.32296	9.5327	94.127	602.238	30.3413	5.94722	13.8261	79.0717	51.2769	7.28409	588.649	10.9726	107.313	14.9492	7.74339
2	28.8603	21.9997	19.6597	22.1562	79.0609	92.4444	20.6528	34.6059	8.98594	14.8112	174.499	1030.15	33.6875	6.03313	18.5419	100.064	50.0969	11.4141	580.733	11.98	137.777	24.5444	9.99781
3	0.314762	0.617619	0.576667	0.708095	1.45762	217.352	26.8376	44.7543	12.4314	39.2481	368.241	1763.07	54.7452	22.2105	24.2695	78.2538	35.0719	41.701	428.613	24.6857	222.125	56.0176	58.3
4	1.73821	1.14308	1.83692	1.2841	4.35795	80.9631	24.9436	24.4282	7.85103	14.95	167.708	710.627	27.7592	11.5436	16.2236	144.13	27.0038	17.3708	544.523	16.2095	146.09	30.8823	32.9746

## Sheet: Correlation
	CI	peak 1	peak 2	peak 3	peak 4	peak 5	peak 6	peak 7	peak 8	peak 9	peak 10	peak 11	peak 12	peak 13	peak 14	peak 15	peak 16	peak 17	peak 18	peak 19	peak 20	peak 21	peak 22	peak 23
CI	1	-0.330**	-0.392**	-0.430**	-0.474**	-0.448**	0.110893	0.293**	0.0757918	0.0216508	0.366**	0.314**	0.194*	0.128243	0.116027	0.236**	0.259**	-0.215**	0.442**	0.0462788	0.479**	0.246**	0.346**	0.484**
peak1	-0.330**	1	0.909**	0.873**	0.555**	0.634**	0.0301265	-0.000971731	0.0762322	-0.0328317	-0.263**	-0.152*	-0.135811	-0.0335221	-0.151*	-0.0817995	-0.0555193	0.247**	-0.322**	0.0465137	-0.286**	-0.366**	-0.350**	-0.391**
peak2	-0.392**	0.909**	1	0.841**	0.680**	0.674**	0.0155612	-0.0320022	0.0850561	-0.0192021	-0.250**	-0.131439	-0.101684	0.0182734	-0.171*	-0.0542621	-0.042551	0.357**	-0.326**	0.132705	-0.309**	-0.292**	-0.351**	-0.421**
peak3	-0.430**	0.873**	0.841**	1	0.833**	0.899**	-0.108534	-0.172*	0.0393962	-0.113866	-0.337**	-0.290**	-0.223**	-0.0325398	-0.199**	-0.186**	-0.166*	0.360**	-0.354**	0.034396	-0.338**	-0.281**	-0.377**	-0.430**
peak4	-0.474**	0.555**	0.680**	0.833**	1	0.927**	-0.232**	-0.315**	-0.0322785	-0.170*	-0.335**	-0.363**	-0.238**	-0.0288242	-0.181**	-0.237**	-0.243**	0.437**	-0.320**	0.100617	-0.352**	-0.0969347	-0.308**	-0.388**
peak5	-0.448**	0.634**	0.674**	0.899**	0.927**	1	-0.219**	-0.306**	-0.061688	-0.178*	-0.372**	-0.390**	-0.320**	-0.0990807	-0.235**	-0.282**	-0.262**	0.372**	-0.361**	-0.0253386	-0.358**	-0.232**	-0.376**	-0.414**
peak6	0.110893	0.0301265	0.0155612	-0.108534	-0.232**	-0.219**	1	0.334**	0.269**	0.624**	0.401**	0.506**	0.707**	0.777**	0.366**	0.348**	-0.0123646	0.00205974	0.184**	-0.000191124	0.552**	0.156*	0.166*	0.240**
peak7	0.293**	-0.000971731	-0.0320022	-0.172*	-0.315**	-0.306**	0.334**	1	0.385**	0.247**	0.496**	0.609**	0.307**	0.316**	0.153*	0.404**	0.158*	-0.249**	0.400**	-0.127137	0.425**	0.232**	0.230**	0.255**
peak8	0.0757918	0.0762322	0.0850561	0.0393962	-0.0322785	-0.061688	0.269**	0.385**	1	0.262**	0.358**	0.399**	0.464**	0.490**	0.0812627	0.212**	-0.0257922	0.150*	0.131685	0.103141	0.117778	0.408**	0.220**	-0.0764632
peak9	0.0216508	-0.0328317	-0.0192021	-0.113866	-0.170*	-0.178*	0.624**	0.247**	0.262**	1	0.294**	0.318**	0.492**	0.503**	0.333**	0.400**	0.217**	0.177*	0.202**	0.236**	0.512**	0.301**	0.272**	0.332**
peak10	0.366**	-0.263**	-0.250**	-0.337**	-0.335**	-0.372**	0.401**	0.496**	0.358**	0.294**	1	0.814**	0.532**	0.447**	0.235**	0.544**	0.0424312	-0.112856	0.820**	-0.187**	0.591**	0.433**	0.477**	0.519**
peak11	0.314**	-0.152*	-0.131439	-0.290**	-0.363**	-0.390**	0.506**	0.609**	0.399**	0.318**	0.814**	1	0.643**	0.535**	0.233**	0.658**	0.241**	-0.0178928	0.669**	-0.0395741	0.547**	0.386**	0.469**	0.359**
peak12	0.194*	-0.135811	-0.101684	-0.223**	-0.238**	-0.320**	0.707**	0.307**	0.464**	0.492**	0.532**	0.643**	1	0.829**	0.385**	0.416**	-0.0192185	0.0398252	0.390**	0.102605	0.505**	0.558**	0.585**	0.376**
peak13	0.128243	-0.0335221	0.0182734	-0.0325398	-0.0288242	-0.0990807	0.777**	0.316**	0.490**	0.503**	0.447**	0.535**	0.829**	1	0.385**	0.365**	-0.0535762	0.173*	0.332**	0.132926	0.543**	0.580**	0.460**	0.274**
peak14	0.116027	-0.151*	-0.171*	-0.199**	-0.181**	-0.235**	0.366**	0.153*	0.0812627	0.333**	0.235**	0.233**	0.385**	0.385**	1	0.172*	0.0966119	-0.0679903	0.265**	0.176*	0.336**	0.314**	0.338**	0.385**
peak15	0.236**	-0.0817995	-0.0542621	-0.186**	-0.237**	-0.282**	0.348**	0.404**	0.212**	0.400**	0.544**	0.658**	0.416**	0.365**	0.172*	1	0.508**	0.328**	0.452**	0.233**	0.433**	0.299**	0.295**	0.244**
peak16	0.259**	-0.0555193	-0.042551	-0.166*	-0.243**	-0.262**	-0.0123646	0.158*	-0.0257922	0.217**	0.0424312	0.241**	-0.0192185	-0.0535762	0.0966119	0.508**	1	0.150*	0.0583296	0.555**	0.0974132	-0.0140634	0.047472	0.0592272
peak17	-0.215**	0.247**	0.357**	0.360**	0.437**	0.372**	0.00205974	-0.249**	0.150*	0.177*	-0.112856	-0.0178928	0.0398252	0.173*	-0.0679903	0.328**	0.150*	1	-0.173*	0.519**	-0.177*	0.094363	-0.146*	-0.327**
peak18	0.442**	-0.322**	-0.326**	-0.354**	-0.320**	-0.361**	0.184**	0.400**	0.131685	0.202**	0.820**	0.669**	0.390**	0.332**	0.265**	0.452**	0.0583296	-0.173*	1	-0.141*	0.657**	0.572**	0.741**	0.730**
peak19	0.0462788	0.0465137	0.132705	0.034396	0.100617	-0.0253386	-0.000191124	-0.127137	0.103141	0.236**	-0.187**	-0.0395741	0.102605	0.132926	0.176*	0.233**	0.555**	0.519**	-0.141*	1	-0.0691484	0.201**	0.0539901	-0.0573351
peak20	0.479**	-0.286**	-0.309**	-0.338**	-0.352**	-0.358**	0.552**	0.425**	0.117778	0.512**	0.591**	0.547**	0.505**	0.543**	0.336**	0.433**	0.0974132	-0.177*	0.657**	-0.0691484	1	0.535**	0.585**	0.735**
peak21	0.246**	-0.366**	-0.292**	-0.281**	-0.0969347	-0.232**	0.156*	0.232**	0.408**	0.301**	0.433**	0.386**	0.558**	0.580**	0.314**	0.299**	-0.0140634	0.094363	0.572**	0.201**	0.535**	1	0.786**	0.550**
peak22	0.346**	-0.350**	-0.351**	-0.377**	-0.308**	-0.376**	0.166*	0.230**	0.220**	0.272**	0.477**	0.469**	0.585**	0.460**	0.338**	0.295**	0.047472	-0.146*	0.741**	0.0539901	0.585**	0.786**	1	0.742**
peak23	0.484**	-0.391**	-0.421**	-0.430**	-0.388**	-0.414**	0.240**	0.255**	-0.0764632	0.332**	0.519**	0.359**	0.376**	0.274**	0.385**	0.244**	0.0592272	-0.327**	0.730**	-0.0573351	0.735**	0.550**	0.742**	1
