# Supplementary material for: Identification and quantification of flavonoids in 207 cultivated lotus ( Nelumbo nucifera ) and their contribution to different colors
Source: PeerJ journal article supplement (doi:10.7717/peerj-achem.22), 2022-08-15
Supplement: achem-71194-Raw_data_of_QPCR.xls [file achem-71194-Raw_data_of_QPCR.xls]

## Sheet: Sheet1
Hole	Sample	Gene	Ct	Mean of Ct
F2	B88	ANS	25.24	25.24	25.14	0.0888819
G2	B88	ANS	25.11	25.11
H2	B88	ANS	25.07	25.07
B4	C3-1	ANS	30.78	30.78	31.0667	0.267644
C4	C3-1	ANS	31.31	31.31
D4	C3-1	ANS	31.11	31.11
B2	A89	ANS	26.43	26.43	26.44	0.115326
C2	A89	ANS	26.33	26.33
D2	A89	ANS	26.56	26.56
F4	X1-2	ANS	24.03	24.03	23.7567	0.280238
G4	X1-2	ANS	23.77	23.77
H4	X1-2	ANS	23.47	23.47
F3	C2-5	ANS	26.35	26.35	25.8533	0.464363
G3	C2-5	ANS	25.43	25.43
H3	C2-5	ANS	25.78	25.78
B3	B121	ANS	31.25	31.25	31.8867	0.611746
C3	B121	ANS	32.47	32.47
D3	B121	ANS	31.94	31.94
F5	B88	DFR	21.49	21.49	21.6167	0.395517
G5	B88	DFR	21.3	21.3
H5	B88	DFR	22.06	22.06
B8	C3-1	DFR	21.96	21.96	21.8267	0.122202
C8	C3-1	DFR	21.72	21.72
D8	C3-1	DFR	21.8	21.8
B5	A89	DFR	22.12	22.12	22.19	0.194679
C5	A89	DFR	22.04	22.04
D5	A89	DFR	22.41	22.41
F8	X1-2	DFR	21.28	21.28	21.1267	0.134288
G8	X1-2	DFR	21.03	21.03
H8	X1-2	DFR	21.07	21.07
F7	C2-5	DFR	21.78	21.78	21.99	0.18735
G7	C2-5	DFR	22.14	22.14
H7	C2-5	DFR	22.05	22.05
B7	B121	DFR	22.09	22.09	22.035	0.0777817
C7	B121	DFR	21.98	21.98
D7	B121	DFR	21.39	21.39
F9	B88	Actin	26.34	26.34	26.3167	0.0680686
G9	B88	Actin	26.37	26.37
H9	B88	Actin	26.24	26.24
B11	C3-1	Actin	29.14	29.14
C11	C3-1	Actin	27.8	27.8	27.77	0.0424264
D11	C3-1	Actin	27.74	27.74
B9	A89	Actin	27.89	27.89	28.1367	0.261024
C9	A89	Actin	28.11	28.11
D9	A89	Actin	28.41	28.41
F11	X1-2	Actin	22.82	22.82	22.98	0.226274
G11	X1-2	Actin	23.14	23.14
H11	X1-2	Actin	24.26	24.26
E10	C2-5	Actin
F10	C2-5	Actin
G10	C2-5	Actin	23.27	23.27	23.21	0.0848528
H10	C2-5	Actin	23.15	23.15
B10	B121	Actin	32.13	32.13
C10	B121	Actin	29.71	29.71	29.905	0.275772
D10	B121	Actin	30.1	30.1

## Sheet: Sheet2
Hole	Sample	Gene	Ct	Mean of Ct
F2	UFGT	B88	36.17	36.17	35.84	0.46669
H2	UFGT	B88	35.51	35.51
C4	UFGT	C3-1	28.67	28.67	27.825	1.19501
D4	UFGT	C3-1	26.98	26.98
A2	UFGT	A89	37.4	37.4	37.87	0.66468
B2	UFGT	A89	38.34	38.34
E4	UFGT	X1-2	29.51	29.51	28.95	0.79196
F4	UFGT	X1-2	28.39	28.39
F3	UFGT	C2-5	35.45	35.45	35.0533	0.381095
G3	UFGT	C2-5	35.02	35.02
H3	UFGT	C2-5	34.69	34.69
B3	UFGT	B121	35.49	35.49	35.34	0.212132
D3	UFGT	B121	35.19	35.19
F5	OMT	B88	24.49	24.49	24.1233	0.33946
G5	OMT	B88	23.82	23.82
H5	OMT	B88	24.06	24.06
B8	OMT	C3-1	25.4	25.4	25.16	0.24
C8	OMT	C3-1	24.92	24.92
D8	OMT	C3-1	25.16	25.16
B5	OMT	A89	24.46	24.46	24.45	0.0458258
C5	OMT	A89	24.4	24.4
D5	OMT	A89	24.49	24.49
F8	OMT	X1-2	22.05	22.05	22.1233	0.287112
G8	OMT	X1-2	21.88	21.88
H8	OMT	X1-2	22.44	22.44
F7	OMT	C2-5	21.27	21.27	21.09	0.156205
G7	OMT	C2-5	20.99	20.99
H7	OMT	C2-5	21.01	21.01
B7	OMT	B121	28.41	28.41	28.43	0.072111
C7	OMT	B121	28.51	28.51
D7	OMT	B121	28.37	28.37
A9	Actin	B88	30.07	30.07	29.885	0.26163
C9	Actin	B88	29.7	29.7
A11	Actin	C3-1	26.97	26.97	27.2567	0.306649
B11	Actin	C3-1	27.22	27.22
C11	Actin	C3-1	27.58	27.58
E9	Actin	A89	34.79	34.79	34.68	0.127671
F9	Actin	A89	34.71	34.71
G9	Actin	A89	34.54	34.54
E11	Actin	X1-2	32.43	32.43	32.3933	0.0907377
F11	Actin	X1-2	32.46	32.46
G11	Actin	X1-2	32.29	32.29
A10	Actin	C2-5	26.55	26.55	26.1	0.412432
B10	Actin	C2-5	26.01	26.01
C10	Actin	C2-5	25.74	25.74
E10	Actin	B121	33.61	33.61	33.52	0.127279
G10	Actin	B121	33.43	33.43

## Sheet: ANS
									act2
	Sample	Detector	Task			Ct Avg	Ct SD		Endo Ct Avg	Endo Ct SD		Avg Delta Ct	delta Ct SD		delta delta Ct	RQ		delta delta Ct-s	SD up		delta delta Ct+s	SD lower
	B88	APX3	Target			25.14	0.0888819		26.3167	0.0680686		-1.17667	0.111952		0	1		1.08069	0.0806897		0.925335	0.074665
	C3-1	APX3	Target			31.0667	0.267644		27.77	0.0424264		3.29667	0.270986		4.47333	0.0450187		0.054321	0.0093023		0.0373093	0.00770931
	A89	APX3	Target			26.44	0.115326		28.1367	0.261024		-1.69667	0.285365		-0.52	1.43396		1.74759	0.313633		1.17661	0.257346
	X1-2	APX3	Target			23.7567	0.280238		22.98	0.226274		0.776667	0.360185		1.95333	0.258219		0.331447	0.0732285		0.201169	0.0570497
	C2-5	APX3	Target			25.8533	0.464363		23.21	0.0848528		2.64333	0.472052		3.82	0.0708052		0.0982126	0.0274074		0.0510462	0.019759
	B121	APX3	Target			31.8867	0.611746		29.905	0.275772		1.98167	0.671032		3.15833	0.112007		0.17834	0.066332		0.0703471	0.0416603
				Name	RQ	SD up	SD lower
				B88	1	0.0806897	0.074665
				C3-1	0.0450187	0.0093023	0.00770931
				A89	1.43396	0.313633	0.257346
				X1-2	0.258219	0.0732285	0.0570497
				C2-5	0.0708052	0.0274074	0.019759
				B121	0.112007	0.066332	0.0416603
	Name	RQ	SD up	SD lower
	B88	1	0.0806897	0.074665
	A89	1.43396	0.313633	0.257346
	B121	0.112007	0.066332	0.0416603
	P
	0.598
	0.012
	0.0001

## Sheet: DFR
									act2
	Sample	Detector	Task			Ct Avg	Ct SD		Endo Ct Avg	Endo Ct SD		Avg Delta Ct	delta Ct SD		delta delta Ct	RQ		delta delta Ct-s	SD up		delta delta Ct+s	SD lower
	B88	APX3	Target			21.6167	0.395517		26.3167	0.0680686		-4.7	0.401331		0	1		1.32073	0.320726		0.757159	0.242841
	C3-1	APX3	Target			21.8267	0.122202		27.77	0.0424264		-5.94333	0.129357		-1.24333	2.36745		2.58953	0.222082		2.16441	0.203036
	A89	APX3	Target			22.19	0.194679		28.1367	0.261024		-5.94667	0.325628		-1.24667	2.37293		2.97377	0.600847		1.89348	0.479447
	X1-2	APX3	Target			21.1267	0.134288		22.98	0.226274		-1.85333	0.263122		2.84667	0.139017		0.166831	0.0278136		0.11584	0.0231766
	C2-5	APX3	Target			21.99	0.18735		23.21	0.0848528		-1.22	0.20567		3.48	0.0896222		0.103354	0.013732		0.0777146	0.0119076
	B121	APX3	Target			22.035	0.0777817		29.905	0.275772		-7.87	0.286531		-3.17	9.00047		10.9779	1.97744		7.37922	1.62124
				Name	RQ	SD up	SD lower
				B88	1	0.320726	0.242841
				C3-1	2.36745	0.222082	0.203036
				A89	2.37293	0.600847	0.479447
				X1-2	0.139017	0.0278136	0.0231766
				C2-5	0.0896222	0.013732	0.0119076
				B121	9.00047	1.97744	1.62124
				Name	RQ	SD up	SD lower
				B88	1	0.320726	0.242841
				A89	2.37293	0.600847	0.479447
				B121	9.00047	1.97744	1.62124
			P
			0.241
			0.051
			1.000

## Sheet: UFGT
									act2
	Sample	Detector	Task			Ct Avg	Ct SD		Endo Ct Avg	Endo Ct SD		Avg Delta Ct	delta Ct SD		delta delta Ct	RQ		delta delta Ct-s	SD up		delta delta Ct+s	SD lower
	B88	APX3	Target			35.84	0.46669		29.885	0.26163		5.955	0.535023		0	1		1.44897	0.448966		0.690147	0.309853
	C3-1	APX3	Target			27.825	1.19501		27.2567	0.306649		0.568333	1.23373		-5.38667	41.8358		98.3869	56.5511		17.7893	24.0465
	A89	APX3	Target			37.87	0.66468		34.68	0.127671		3.19	0.676831		-2.765	6.79748		10.8666	4.06914		4.25208	2.5454
	X1-2	APX3	Target			28.95	0.79196		32.3933	0.0907377		-3.44333	0.797141		-9.39833	674.808		1172.58	497.775		388.344	286.464
	C2-5	APX3	Target			35.0533	0.381095		26.1	0.412432		8.95333	0.561545		2.99833	0.125144		0.184694	0.0595499		0.0847949	0.0403496
	B121	APX3	Target			35.34	0.212132		33.52	0.127279		1.82	0.247386		-4.135	17.5695		20.8559	3.28645		14.8009	2.76858
				Name	RQ	SD up	SD lower
				B88	1	0.448966	0.309853
				C3-1	41.8358	56.5511	24.0465
				A89	6.79748	4.06914	2.5454
				X1-2	674.808	497.775	286.464
				C2-5	0.125144	0.0595499	0.0403496
				B121	17.5695	3.28645	2.76858
				Name	RQ	SD up	SD lower
				B88	1	0.448966	0.309853
				A89	6.79748	4.06914	2.5454
				B121	17.5695	3.28645	2.76858
				P
				0.287
				0.595
				0.581

## Sheet: OMT
									act2
	Sample	Detector	Task			Ct Avg	Ct SD		Endo Ct Avg	Endo Ct SD		Avg Delta Ct	delta Ct SD		delta delta Ct	RQ		delta delta Ct-s	SD up		delta delta Ct+s	SD lower
	B88	APX3	Target			24.1233	0.33946		30.3233	0.78143		-6.2	0.851978		0	1		1.80497	0.804974		0.554025	0.445975
	C3-1	APX3	Target			25.16	0.24		27.2567	0.306649		-2.09667	0.389401		4.10333	0.05818		0.076207	0.018027		0.0444173	0.0137627
	A89	APX3	Target			24.45	0.0458258		34.68	0.127671		-10.23	0.135647		-4.03	16.3362		17.9467	1.6105		14.8702	1.46598
	X1-2	APX3	Target			22.1233	0.287112		32.3933	0.0907377		-10.27	0.301109		-4.07	16.7955		20.6935	3.89808		13.6317	3.16379
	C2-5	APX3	Target			21.09	0.156205		26.1	0.412432		-5.01	0.441022		1.19	0.438303		0.595025	0.156722		0.32286	0.115443
	B121	APX3	Target			28.43	0.072111		33.6333	0.215948		-5.20333	0.227669		0.996667	0.501157		0.586825	0.0856686		0.427994	0.0731621
				Name	RQ	SD up	SD lower
				B88	1	0.879165	0.445975
				C3-1	0.05818	0.217506	0.0137627
				A89	16.3362	1.7691	1.46598
				X1-2	16.7955	0.0567241	3.16379
				C2-5	0.438303	0.0137513	0.115443
				B121	0.501157	0.0278122	0.0731621
				Name	RQ	SD up	SD lower
				B88	1	0.879165	0.445975
				A89	16.3362	1.7691	1.46598
				B121	0.501157	0.0278122	0.0731621
				P
				0.092
				0.0001
				0.0001
